# Supplementary material for: Efficient Friedel–Crafts alkylation of indoles and pyrrole with enones and nitroalkene in water
Source: Royal Society of Chemistry journal article supplement (doi:10.1039/b610263h), 2006-01-01
Supplement: b610263h.pdf [file b610263h.pdf]

# Supporting Information

## Heteropoly Acid Promoted Highly Efficient 1,4-Additions of Indoles and Pyrrole to Enones and Nitroalkene in Water

Mohammad R. Saidi\* Fezzeh Arynasab and Najmodin Azizi

*Department of Chemistry, Sharif University of Technology, P. O.*

*Box 11465-9516 Tehran 11365, Iran*

Email [saidi@sharif.edu](mailto:saidi@sharif.edu)

### Table of content

| Contents:                                                         | Page number |
|-------------------------------------------------------------------|-------------|
| Experimental Section .....                                        | S2          |
| <sup>1</sup> H and <sup>13</sup> C NMR spectra for products ..... | S4-S27      |

## Experimental Section

**General.** All chemicals were purchased and used without any further purification. NMR spectra were recorded at 500 MHz for proton and at 125.7 MHz for carbon nuclei in ( $\text{CDCl}_3/\text{CCl}_4$ ) or ( $\text{DMSO-d}_6/\text{CDCl}_3$ ). The products were purified by column chromatography carried out on silica gel by using ethyl acetate/ petroleum ether mixtures. Reactions were carried out room temperature, all the indole derivatives and Michael acceptors were employed, are commercially available. All products obtained are known compound.  $\text{H}_3\text{PMO}_{12}\text{O}_{40}$  and  $\text{H}_3\text{PW}_{12}\text{O}_{40}$  and other catalyst used without further purification. Water distilled before used.

### General procedure for the Catalytic Michael addition of indole:

In the test tube equipped with magnet were introduces  $\text{H}_3\text{PMO}_{12}\text{O}_{40}$  (10 mg, 0.0055 mmol) or  $\text{H}_3\text{PW}_{12}\text{O}_{40}$  (10 mg, 0.0035 mmol), indole (1 mmol) and 2 ml of water. The Michael acceptor (1mmol) was added in one portion and the test tube was kept at room temperature under vigorous stirring for 1 -18. After the reaction was completed, water (2 ml) was added and the aqueous mixture was extracted with 10 ml of diethyl ether or ethyl acetate and dried over anhydrous  $\text{Na}_2\text{SO}_4$ , and solvent was removed under reduce pressure to give the Michael addition products. The crude product was analyzed by  $^1\text{H}$  and  $^{13}\text{C}$  NMR. Further purification was carried out by short column chromatography on silica gel (ethyl acetate/petroleum ether). All compounds were characterized on the basis of their spectroscopic data (IR, NMR) and by comparison with those reported in the literature.<sup>1-12</sup>

### **General procedure for the Catalytic Michael addition of Pyrrole**

In the test tube equipped with magnet were introduced Michael acceptor (1-2.5 mmol, see Table 4), pyrrole (1 mmol) and 2 ml of water.  $\text{H}_3\text{PMO}_{12}\text{O}_{40}$  (10 mg, 0.0055 mmol) or  $\text{H}_3\text{PW}_{12}\text{O}_{40}$  (10 mg, 0.0035 mmol), was added in one portion and the test tube was kept at room temperature under vigorous stirring for 1-12. After the reaction was completed, water (2 ml) was added and the aqueous mixture was extracted with 10 ml of diethyl ether or ethyl acetate and dried over anhydrous  $\text{Na}_2\text{SO}_4$ , and solvent was removed under reduced pressure to give the Michael addition products. The crude product was analyzed by  $^1\text{H}$  and  $^{13}\text{C}$  NMR. Further purification was carried out by short column chromatography on silica gel (ethyl acetate/petroleum ether). All compounds were characterized on the basis of their spectroscopic data (IR, NMR).

T17 1HNMR in CDCl3 at 298 K B4/4/14

Current Data Parameters  
 NAME AZ171  
 EXPNO 144  
 PROCNO 1

F2 - Acquisition Parameters  
 Date\_ 20050705  
 Time 10.42  
 INSTRUM spect  
 PROBHD 5 mm BBI 1H-BB  
 PULPROG zg  
 TO 32766  
 SOLVENT CDCl3  
 NS B  
 DS 2  
 SWH 10000.000 Hz  
 FIDRES 0.305176 Hz  
 AQ 1.6385000 sec  
 RG 35.9  
 DM 50.000 usec  
 DE 6.50 usec  
 TE 369.1 K  
 D1 3.0000000 sec  
 MCREST 0.0000000 sec  
 MCWRRK 0.015000000 sec

\*\*\*\*\* CHANNEL f1 \*\*\*\*\*  
 NUC1 1H  
 P1 32.00 usec  
 PL1 2.00 dB  
 SFO1 500.1330885 MHz

F2 - Processing parameters  
 SI 32768  
 SF 500.1300000 MHz  
 XDM EM  
 SSB 0  
 LB 0.30 Hz  
 GB 0  
 PC 1.00

1D NMR plot parameters  
 CX 18.00 cm  
 CY 16.77 cm  
 F1P 10.115 ppm  
 F1 5060.49 Hz  
 F2P 0.121 ppm  
 F2 60.49 Hz  
 PPMCM 0.55541 ppm/cm  
 HZCM 277.77777 Hz/cm

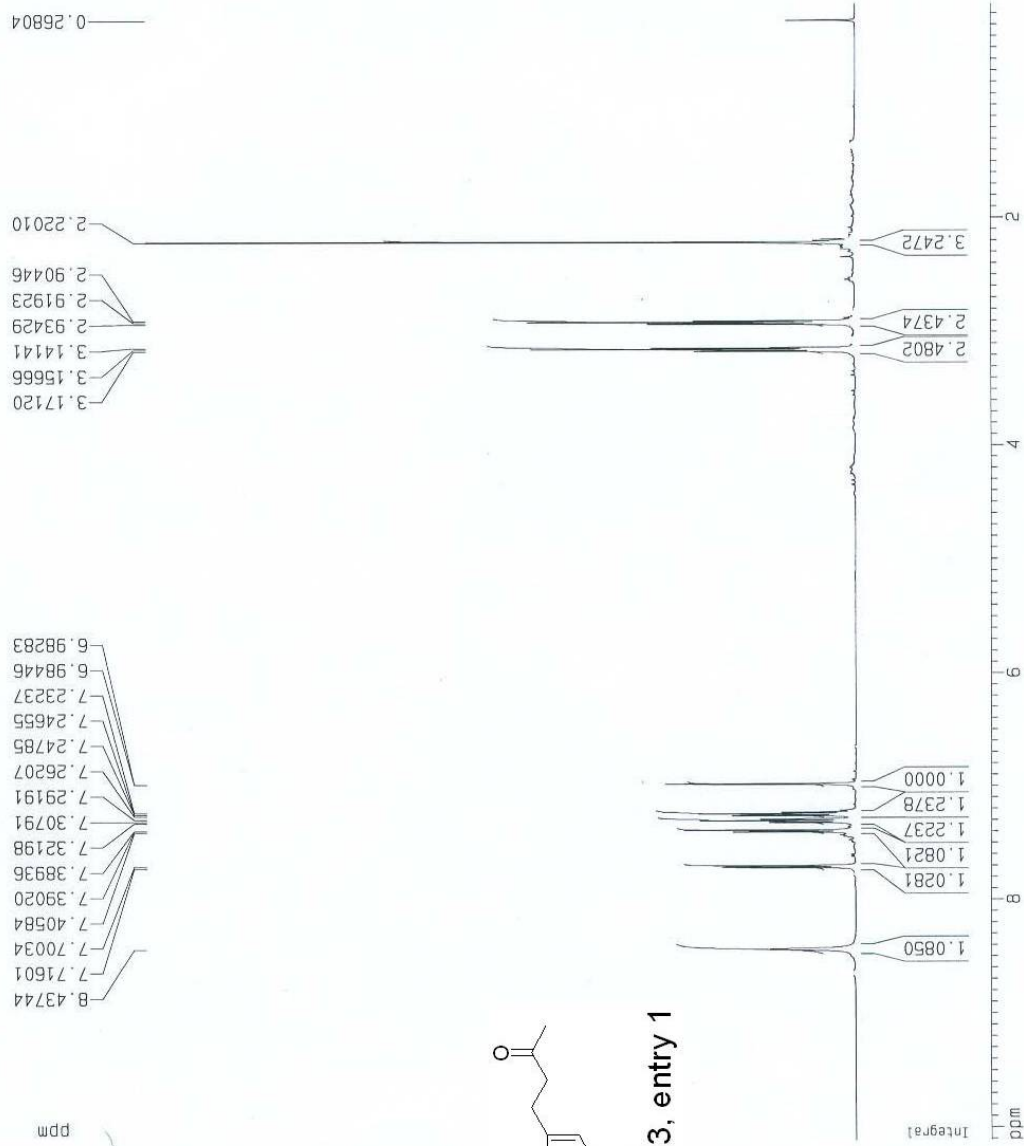

Table 3, entry 1

T17 13CNMR in CDC13 at 298 K 84/4/14

Current Data Parameters  
NAME Az121  
EXPNO 145  
PROCNO 1

F2 - Acquisition Parameters  
Date\_ 20060705  
Time 10.45  
INSTRUM spect  
PROBHD 5 mm BBI 1H-BB  
PULPROG zgpg30  
TD 65536  
SOLVENT CDCl3  
NS 21  
DS 4  
SWH 30030.029 Hz  
FIDRES 0.458222 Hz  
AQ 1.0912410 sec  
RG 32768  
DK 16.650 usec  
DE 6.50 usec  
TE 367.7 K  
D1 2.0000000 sec  
d11 0.0300000 sec  
DELTA 1.8959998 sec  
MCREST 0.0000000 sec  
MCWRK 0.0150000 sec

==== CHANNEL f1 =====  
NUC1 13C  
P1 10.50 usec  
PL1 0.00 dB  
SF01 125.7703643 MHz

==== CHANNEL f2 =====  
CPDPRG2 waltz16  
NUC2 1H  
PCPD2 67.00 usec  
PL2 -6.00 dB  
PL12 12.00 dB  
PL13 12.00 dB  
SF02 500.1320005 MHz

F2 - Processing parameters  
SI 32768  
SF 125.7577590 MHz  
WDW EM  
SSB 0  
LB 1.00 Hz  
GB 0  
PC 1.40

1D NMR plot parameters  
CX 20.00 cm  
CY 12.41 cm  
FIP 218.504 ppm  
F1 27478.52 Hz  
F2 -3.049 ppm  
F2 -383.39 Hz  
PRMCK 11.07761 ppm/cm  
HZCM 4393.09556 Hz/cm

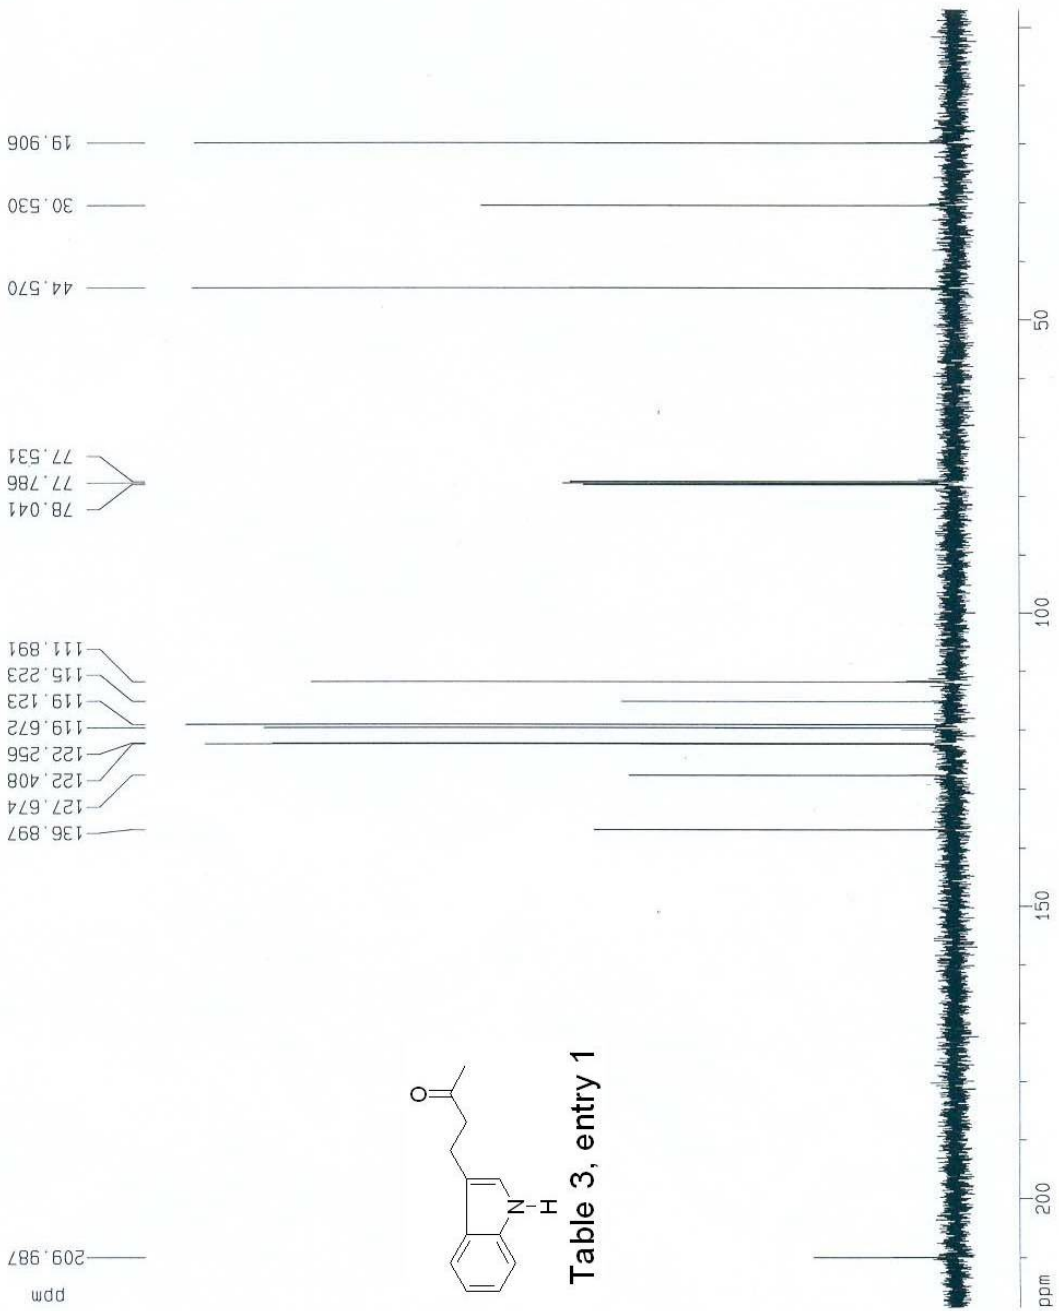

Table 3, entry 1

a-247 1HNMR in CDCl3 at 298 K 84/10/13

```

Current Data Parameters
NAME      Azizi
EXPNO    64
PROCNO   1

F2 - Acquisition Parameters
Date_    20060103
Time     17.27
INSTRUM  spect
PROBHD   5 mm BBI 1H-BB
PULPROG  zg30
TD       32768
SOLVENT  CDCl3
NS       4
DS       0
SMH      10330.578 Hz
FIDRES   0.315264 Hz
AQ       1.5860696 sec
RG       40.3
RW       48.400 usec
DE       6.50 usec
TE       291.4 K
D1       2.00000000 sec
MCREST   0.00000000 sec
MCMRK    0.01500000 sec

===== CHANNEL f1 =====
NUC1     1H
P1       10.30 usec
PL1      2.00 dB
SF01     500.1330885 MHz

F2 - Processing parameters
SI       32768
SF       500.1330000 MHz
WDW      EM
SSB      0
LB       0.30 Hz
GB       0
PC       1.00

1D NMR plot parameters
CX       18.00 cm
CY       23.88 cm
F1P      12.023 ppm
F1       6013.30 Hz
F2P      0.195 ppm
F2       97.49 Hz
PPMCM    0.65714 ppm/cm
HZCM     328.65564 Hz/cm
  
```

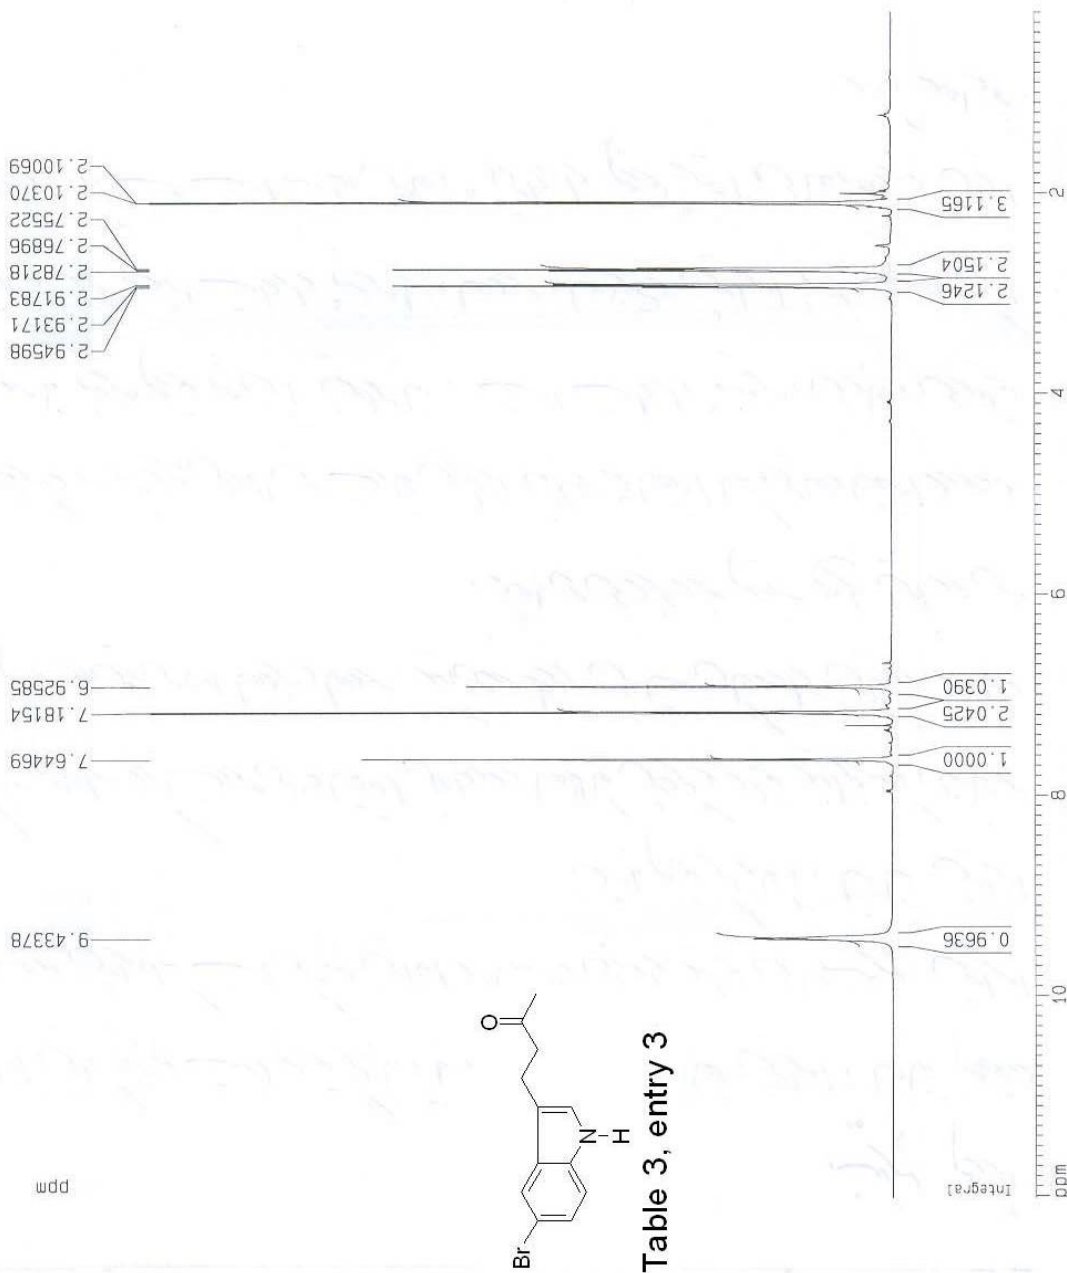

Table 3, entry 3

a-247 13C NMR in CDCl3 at 298 K 84/10/13

Current Data Parameters  
 NAME Az121  
 EXPNO 65  
 PROCNO 1

F2 - Acquisition Parameters  
 Date\_ 20050103  
 Time 17 29  
 INSTRUM spect  
 PROBHD 5 mm BBI 1H-BB  
 PULPROG zgpg30  
 TD 65536  
 SOLVENT CDCl3  
 NS 48  
 DS 2  
 SWH 40000.000 Hz  
 FIDRES 0.610352 Hz  
 AQ 0.8192625 sec  
 RG 2298.8  
 DK 12.500 usec  
 DE 6.50 usec  
 TE 292.1 K  
 D1 3.0000000 sec  
 d11 0.0300000 sec  
 DELTA 2.9000010 sec  
 MCFST 0.0000000 sec  
 MCWRK 0.0150000 sec

\*\*\*\*\* CHANNEL f1 \*\*\*\*\*  
 NUC1 13C  
 P1 10.50 usec  
 PL1 0.00 dB  
 SFO1 125.7703143 MHz

\*\*\*\*\* CHANNEL f2 \*\*\*\*\*  
 CPDPRG2 waltz16  
 NUC2 1H  
 PCPD2 87.00 usec  
 PL2 -6.00 dB  
 PL12 12.00 dB  
 PL13 12.00 dB  
 SFO2 500.1320005 MHz

F2 - Processing parameters  
 SI 32788  
 SF 125.7577350 MHz  
 MDW FM  
 SSB 0  
 LB 1.00 Hz  
 GB 0  
 PC 1.40

1D NMR plot parameters  
 CX 20.00 cm  
 CY 5.96 cm  
 F1P 219.273 ppm  
 F1 27575.29 Hz  
 F2P -2.250 ppm  
 F2 -287.96 Hz  
 PRMCM 11.07815 ppm/cm  
 HZCM 1383.16248 Hz/cm

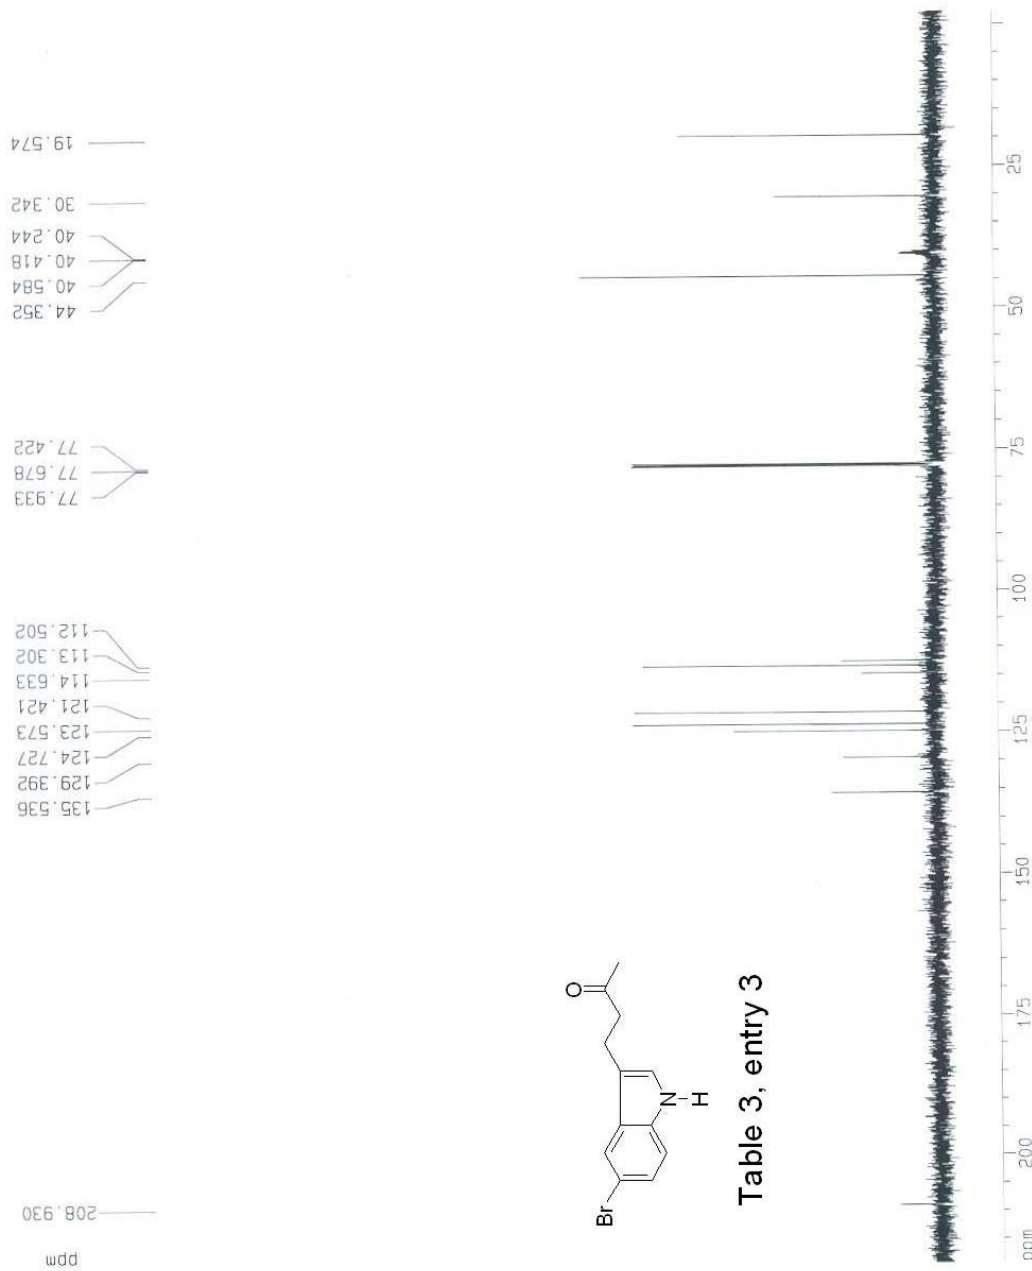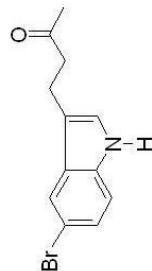

Table 3, entry 3

A34, <sup>1</sup>H NMR in CDCl<sub>3</sub> at 298 K 84/5/22

```

Current Data Parameters
NAME      AZ121
EXPNO    B
PROCNO   1

F2 - Acquisition Parameters
Date_    20050814
Time     9.23
INSTRUM spect
PROBHD   5 mm GNP 1H/13
PULPROG  zg
TD        32768
SOLVENT  CDCl3
NS        4
DS        2
SWH       10000.000 Hz
FIDRES    0.305175 Hz
AQ        1.6385000 sec
RG        11.3
DW        50.000 usec
DE        6.50 usec
TE        298.0 K
D1        3.0000000 sec
MCREST    0.0000000 sec
MCWRK     0.0150000 sec

===== CHANNEL f1 =====
NUC1      1H
P1        32.00 usec
PL1       2.00 dB
SFO1      500.1350885 MHz

F2 - Processing parameters
SI         32768
SF         500.1300000 MHz
WDW        EM
SSB        0
LB         0.30 Hz
GB         0
PC         1.00

1D NMR plot parameters
CX         18.0 cm
CY         26.06 cm
F1P        9.471 ppm
F1         4736.74 Hz
F2P        0.004 ppm
F2         2.22 Hz
PPMCM      0.52592 ppm/cm
HZCM       263.07850 Hz/cm
  
```

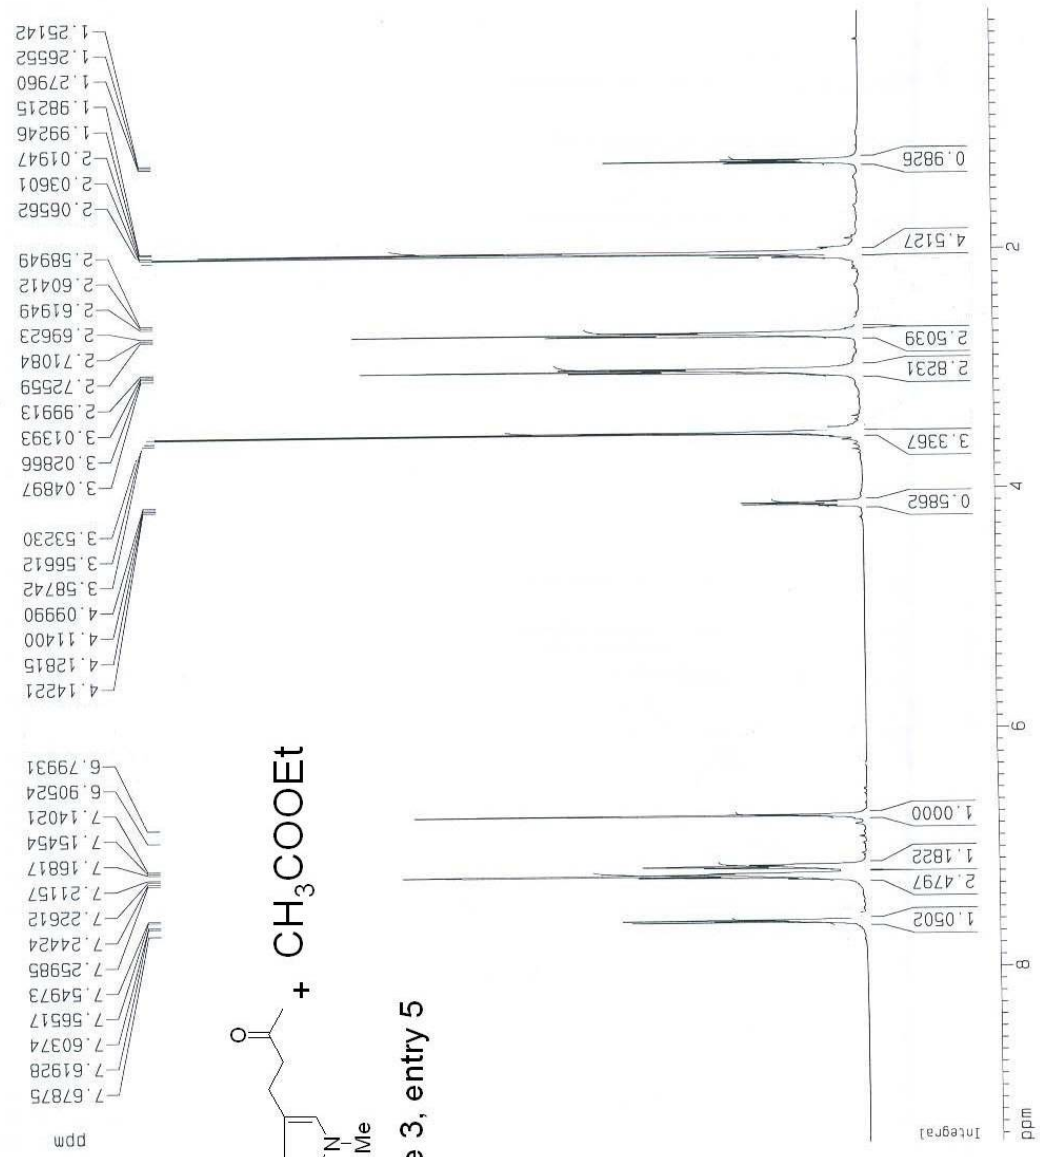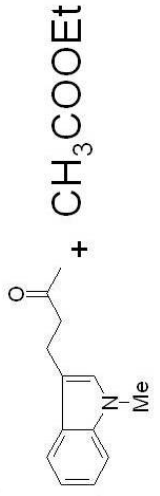

Table 3, entry 5



A-34 <sup>13</sup>CNMR in CDCl<sub>3</sub> at 298 K 84/5/22

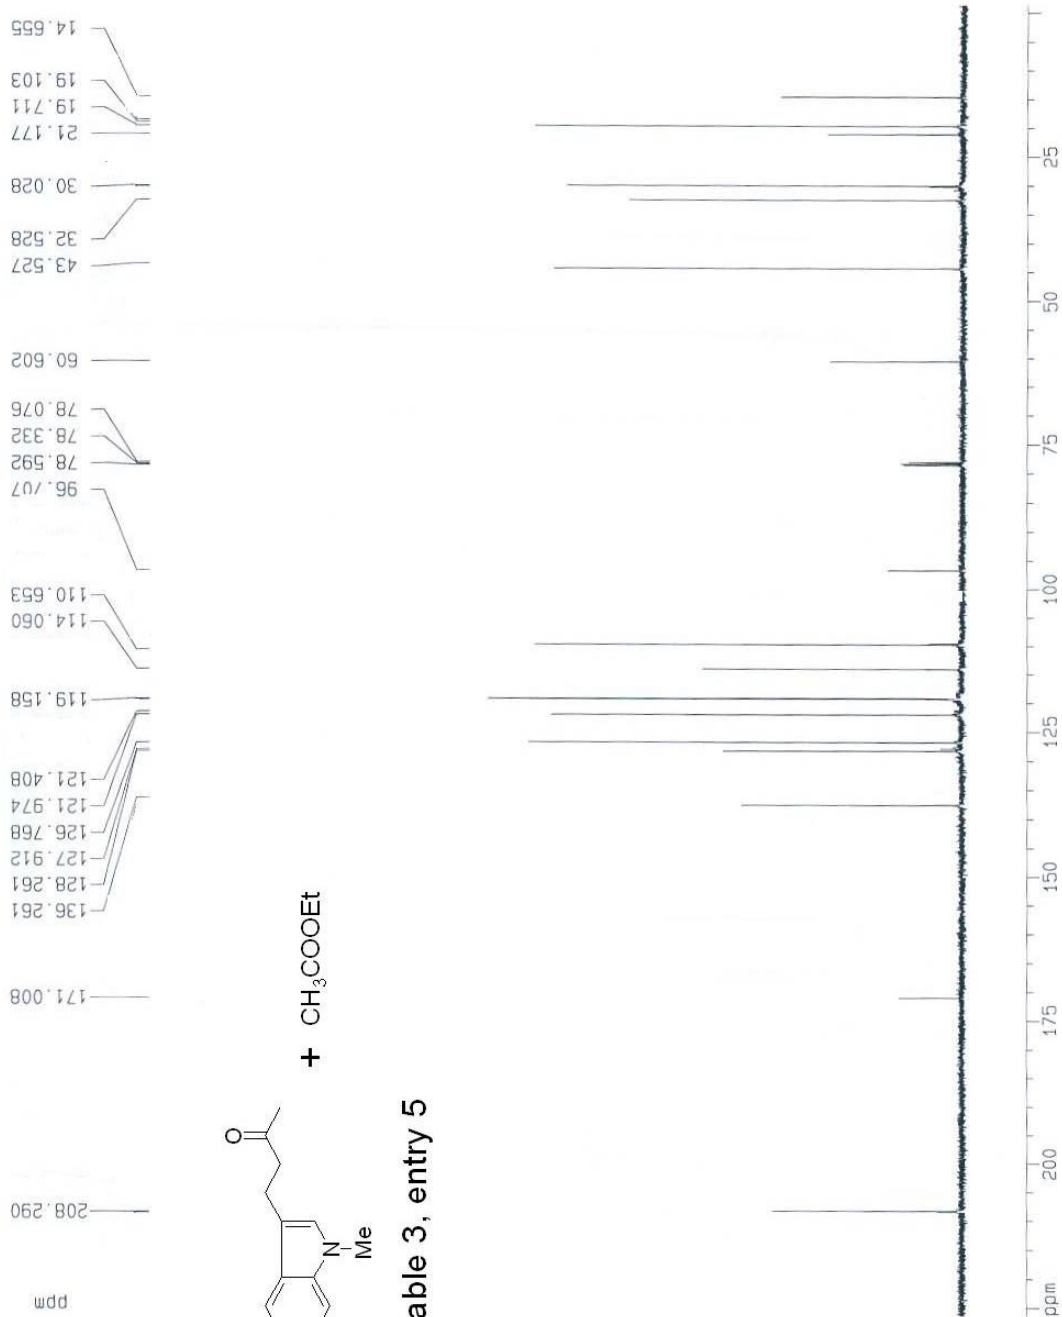

```

Current Data Parameters
NAME Az121
EXPNO 9
PROCNO 1
F2 Acquisition Parameters
Date_ 20050814
Time 9:26
INSTRUM spect
PROBHD 5 mm QNP 1H/13
PULPROG zgpg30
TD 65536
SOLV NT CDCl3
NS 51
DS 2
SWH 40000.000 Hz
FIDRES 0.610352 Hz
AQ 0.6191625 s.c.
RG 2560.3
Dw -2.570 u.s.
DE 6.50 u.s.
TE -90.0 K
D1 3.0000000 s.
d11 0.0500000 s.c.
DELTA 2.9000000 s.c.
MGREST 0.0000000 s.
AcqPrk 1.000000 s.

***** CHANNEL f1 *****
NUC1 13C
P1 9.10 u.s.
PL1 3.00 dB
SFO1 125.7703143 MHz

***** CHANNEL f2 *****
C13PRG2 waltz16
NUC2 1H
P2 80.00 u.s.
PL2 0.00 dB
PL12 15.50 dB
PL13 15.50 dB
SFO2 500.1320005 MHz

F2 - Processing parameters
SI 32768
SF 125.7677350 MHz
WDW EM
SS 0
LB 0.00 Hz
GB 0
PC 1.40

.D NMR p.p.t. parameters
CX 20.00 CF
CY 7.30 CF
F1P 226.310 DC.
F1 28460.25 Hz
F2P -1.375 ppm
F2 -188.07 Hz
PPMCM 11.00233 ppm/cm
HZCM 1431.41585 Hz/cm
  
```

a-80 1H NMR in CDCl3 at 300 K 84/6/22

Current Data Parameters  
 NAME Aryanasab  
 EXPNO 28  
 PROCNO 1

F2 - Acquisition Parameters  
 Date\_ 20050913  
 Time 10.08  
 INSTRUM spect  
 PROBHD 5 mm QNP 1H/13  
 PULPROG zg  
 TD 32768  
 SOLVENT CDCl3  
 NS 1  
 DS 0  
 SWH 10000.000 Hz  
 FIDRES 0.305175 Hz  
 AQ 1.6385000 sec  
 RG 362  
 DW 50.000 usec  
 DE 6.50 usec  
 TE 300.0 K  
 D1 1.00000000 sec  
 MCREST 0.00000000 sec  
 MCWAK 0.01500000 sec

===== CHANNEL f1 =====  
 NUC1 1H  
 P1 32.00 usec  
 PL1 2.00 dB  
 SF01 500.1330885 MHz

F2 - Processing parameters  
 SI 32768  
 SF 500.1300000 MHz  
 WDW EM  
 SSB 0  
 LB 0.30 Hz  
 GB 0  
 PC 1.00

1D NMR plot parameters  
 CX 18.00 cm  
 CY 13.07 cm  
 F1P 10.228 ppm  
 F1 5115.21 Hz  
 F2P -0.401 ppm  
 F2 -200.33 Hz  
 PPMCM 0.59046 ppm/cm  
 HZCM 295.30740 Hz/cm

8.05233  
7.98969  
7.97529  
7.97298  
7.49312  
7.47750  
7.46225  
7.41448  
7.39965  
7.36836  
7.35206  
7.32226  
7.30639  
7.29182  
7.21182  
7.19526  
7.06733  
7.03444  
7.03097  
5.14098  
5.12655  
5.11229  
4.20284  
4.18858  
4.17429  
4.16002  
3.88092  
3.86118  
3.84756  
3.80619  
3.79092  
3.77286  
3.75765  
2.10202  
1.33093  
1.31661  
1.30236  
0.06325

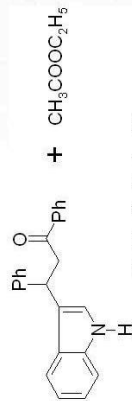

Table 3, Entry 7

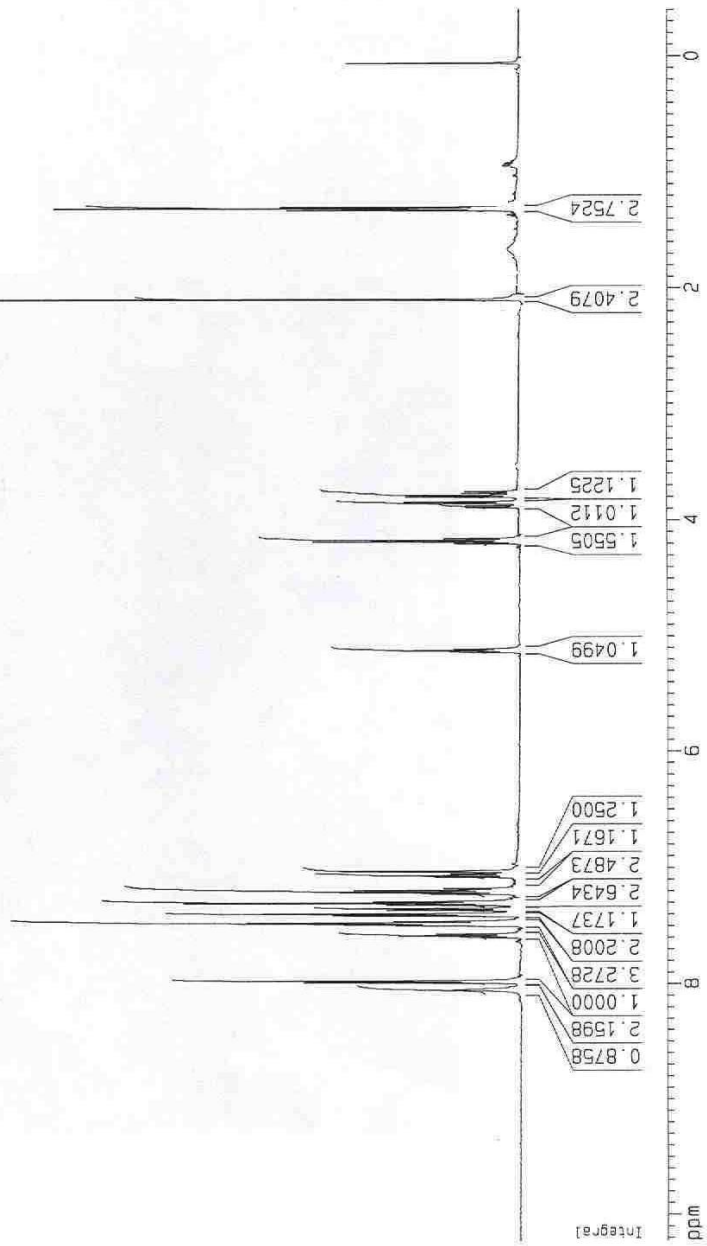

a-133 1HNMR in CDCl3 at 298 K 8/7/11

Current Data Parameters  
 NAME Aryanasab  
 EXPNO 34  
 PROCNO 1

F2 - Acquisition Parameters  
 Date\_ 20051003  
 Time 13.48  
 INSTRUM spect  
 PROBHD 5 mm BBI 4H-BB  
 PULPROG zg  
 TD 32768  
 SOLVENT CDCl3  
 NS 4  
 DS 2  
 SMH 10000.000 Hz  
 FIDRES 0.305176 Hz  
 AQ 1.6385000 sec  
 RG 45.3  
 DM 50.000 usec  
 DE 6.50 usec  
 TE 291.8 K  
 D1 3.00000000 sec  
 MCREST 0.00000000 sec  
 MCWPK 0.01500000 sec

===== CHANNEL f1 =====  
 NUJC1 4H  
 F1 32.00 usec  
 PL1 2.00 dB  
 SF01 500.1330885 MHz

F2 - Processing parameters  
 S1 32768  
 SF 500.1300000 MHz  
 WDW EM  
 SSB 0  
 LB 0.30 Hz  
 GB 0  
 PC 1.00

1D NMR plot parameters  
 CX 18.00 cm  
 CY 26.38 cm  
 FIP 11.391 ppm  
 F1 5697.20 Hz  
 F2p -0.171 ppm  
 F2 -85.41 Hz  
 PPMCM 0.54235 ppm/cm  
 HZCM 321.255607 Hz/cm

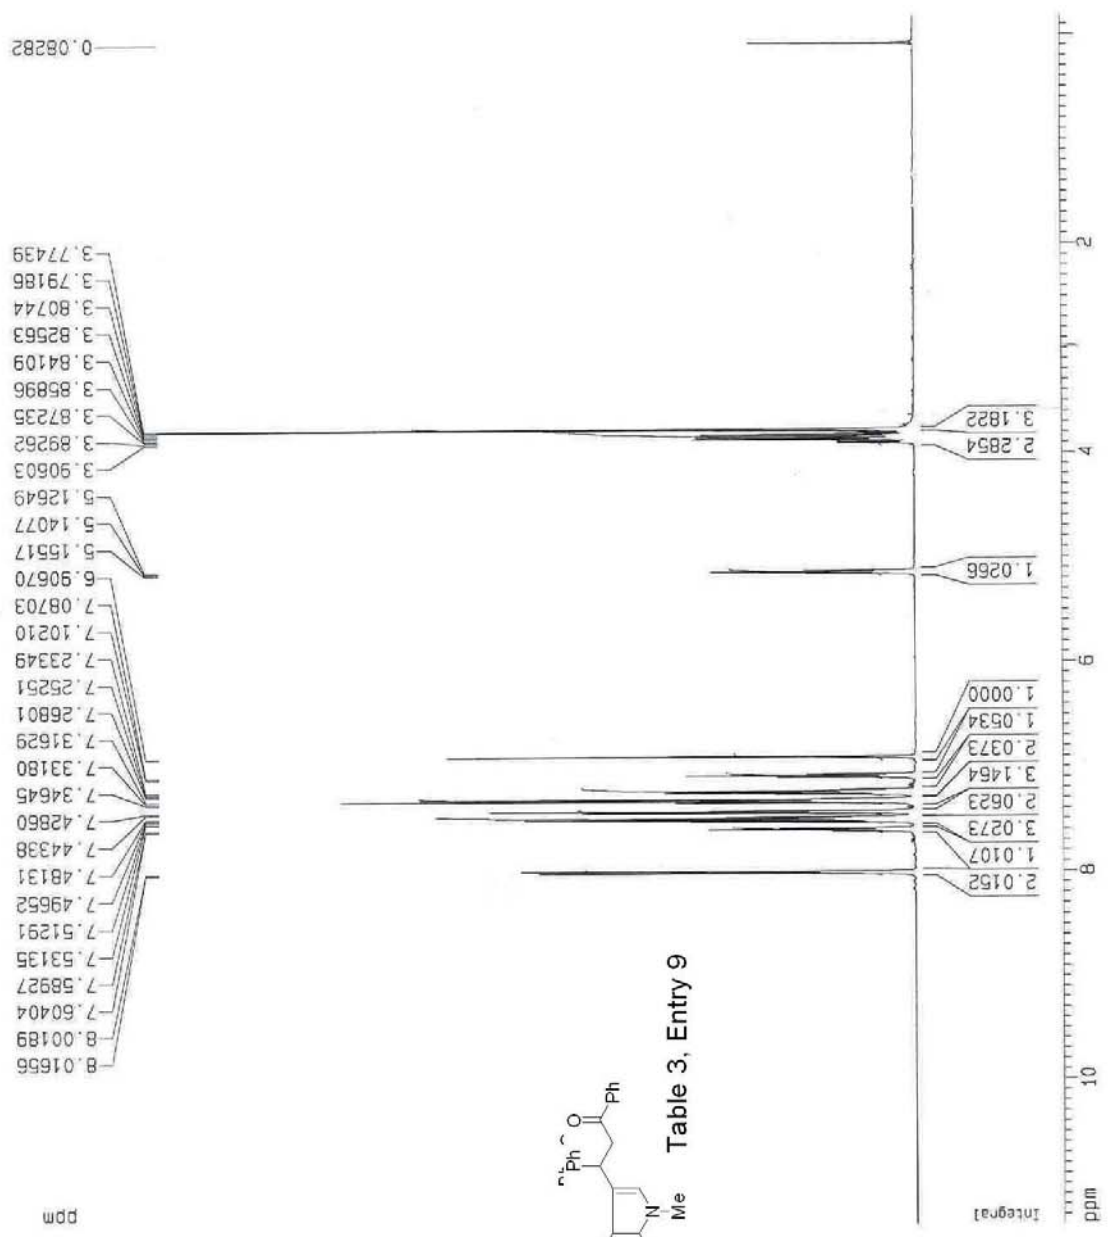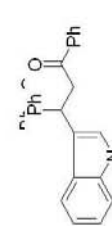

Table 3, Entry 9

a-133 13CNMR in CDCl3 at 298 K 84/7/11

198.934

144.871  
137.822  
137.662  
133.376  
128.991  
128.865  
128.543  
128.266  
127.484  
126.685  
122.131  
120.059  
119.312  
118.309  
109.633

45.810  
38.631  
33.097

Current Data Parameters  
 NAME Aryanasab  
 EXPNO 35  
 PROCNO 1

F2 - Acquisition Parameters  
 Date\_ 20051003  
 Time 13.50  
 INSTRUM spect  
 PROBH0 5 mm BBI 4H-BB  
 PULPROG zgpg30  
 TD 65536  
 SOLVENT CDCl3  
 NS 104  
 DS 2  
 SWH 40000.000 Hz  
 FIDRES 0.610352 Hz  
 AQ 0.8192625 sec  
 RG 2560.3  
 DW 12.500 usec  
 DE 6.50 usec  
 TE 292.7 K  
 D1 3.0000000 sec  
 d11 0.0300000 sec  
 DELTA 2.9000010 sec  
 ACQRES 0.0000000 sec  
 MCWRR 0.01500000 sec

===== CHANNEL f1 =====  
 NUC1 13C  
 P1 10.50 usec  
 PL1 0.00 dB  
 SF01 125.7703143 MHz

===== CHANNEL f2 =====  
 CPDPRG2 waltz16  
 NUC2 1H  
 PCPD2 87.00 usec  
 PL2 -6.00 dB  
 PL12 12.00 dB  
 PL13 12.00 dB  
 SF02 500.1320005 MHz

F2 - Processing parameters  
 SI 32768  
 SF 125.7577390 MHz  
 WDW EM  
 SSB 0  
 LB 1.00 Hz  
 GB 0  
 PC 1.40

1D NMR plot parameters  
 CX 20.00 cm  
 CY 16.28 cm  
 F1P 224.459 ppm  
 F1 28227.46 Hz  
 F2P 2.846 ppm  
 F2 357.90 Hz  
 PPMCM 11.08066 ppm/cm  
 HZCM 1393.47803 Hz/cm

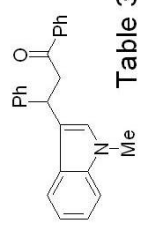

Table 3, Entry 9

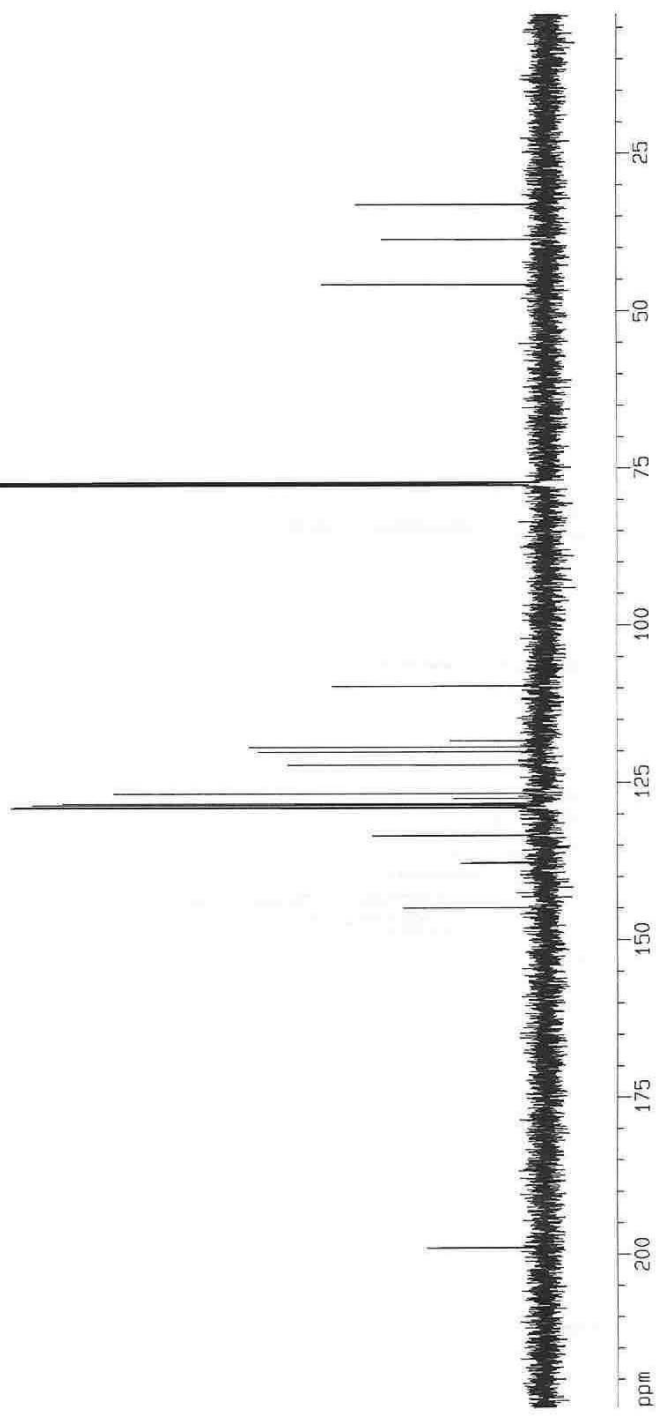

a-83 1HNMR in DMSO at 298 K 84/B/2

Current Data Parameters  
 NAME Aryanasab  
 EXPNO 52  
 PROCNO 1

F2 - Acquisition Parameters  
 Date\_ 20051024  
 Time 11.28  
 INSTRUM spect  
 PROBHD 5 mm BBI 1H-BB  
 PULPROG zg  
 TO 32768  
 SOLVENT DMSO  
 NS 8  
 DS 2  
 SWH 10000.000 Hz  
 FIDRES 0.305176 Hz  
 AQ 1.6385000 sec  
 h1 161.3  
 DW 50.000 usec  
 DE 6.50 usec  
 TE 291.5 K  
 D1 3.00000000 sec  
 MCREST 0.00000000 sec  
 MCWRK 0.01500000 sec

\*\*\*\*\* CHANNEL f1 \*\*\*\*\*  
 NUC1 1H  
 P1 10.30 usec  
 PL1 2.00 dB  
 SF01 500.1330885 MHz

F2 - Processing parameters  
 SI 32768  
 SF 500.1300000 MHz  
 WDW EM  
 SSB 0  
 LB 0.30 Hz  
 GB 0  
 PC 1.00

10 NMR plot parameters  
 CX 18.00 cm  
 CY 461.12 cm  
 F1P 12.478 ppm  
 F1 6240.68 Hz  
 F2P -0.453 ppm  
 F2 -226.71 Hz  
 PPMCM 0.71841 ppm/c  
 HZCM 359.29953 Hz/cm

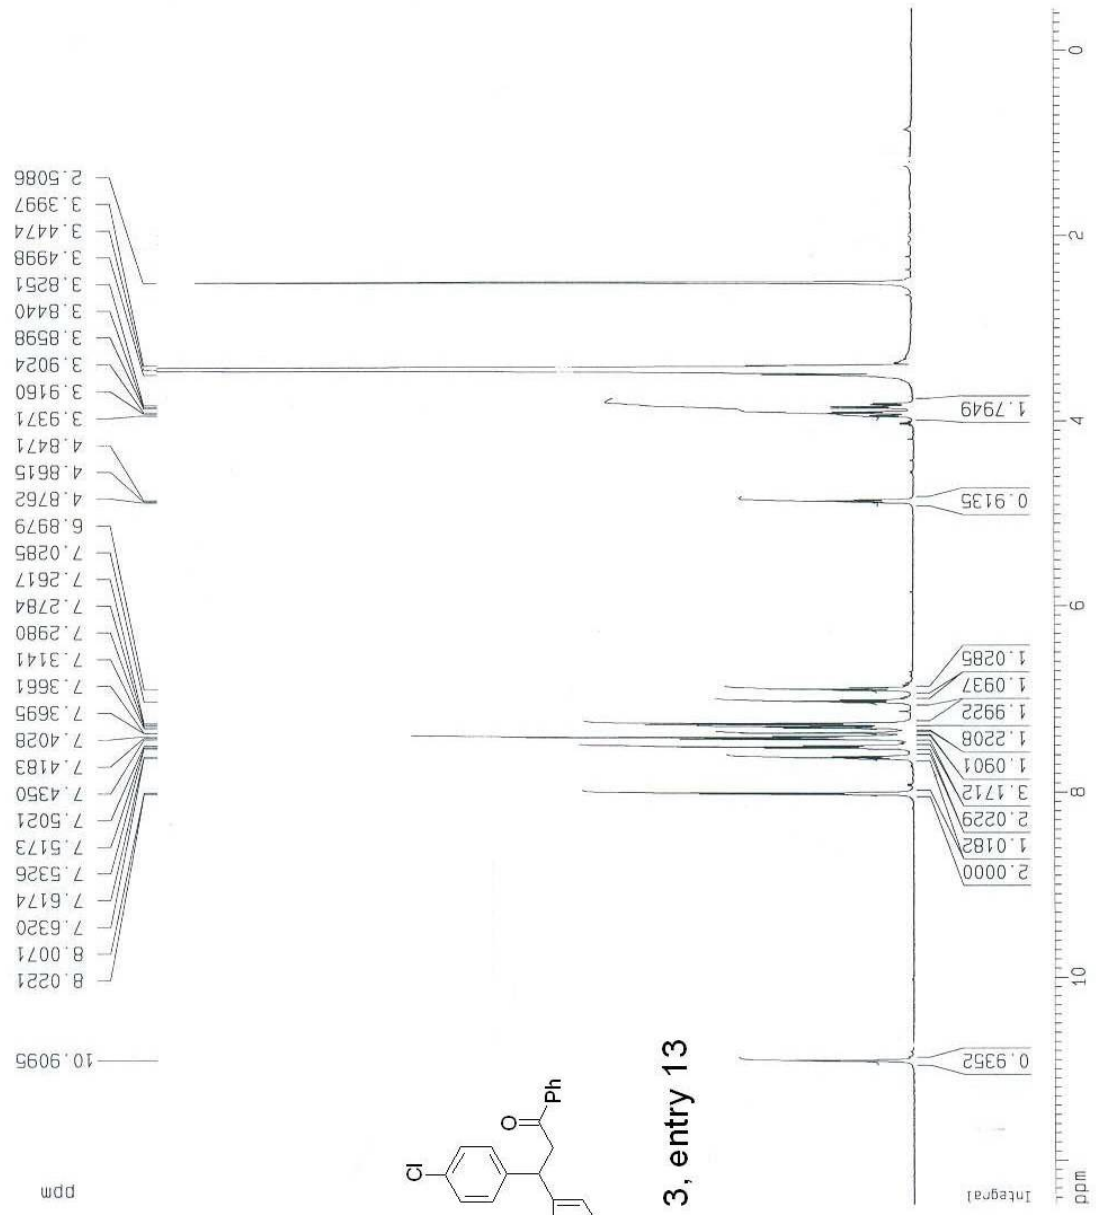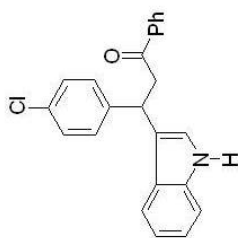

Table 3, entry 13

a-83\_13CNMR in DMSO at 298 K 84/B/2

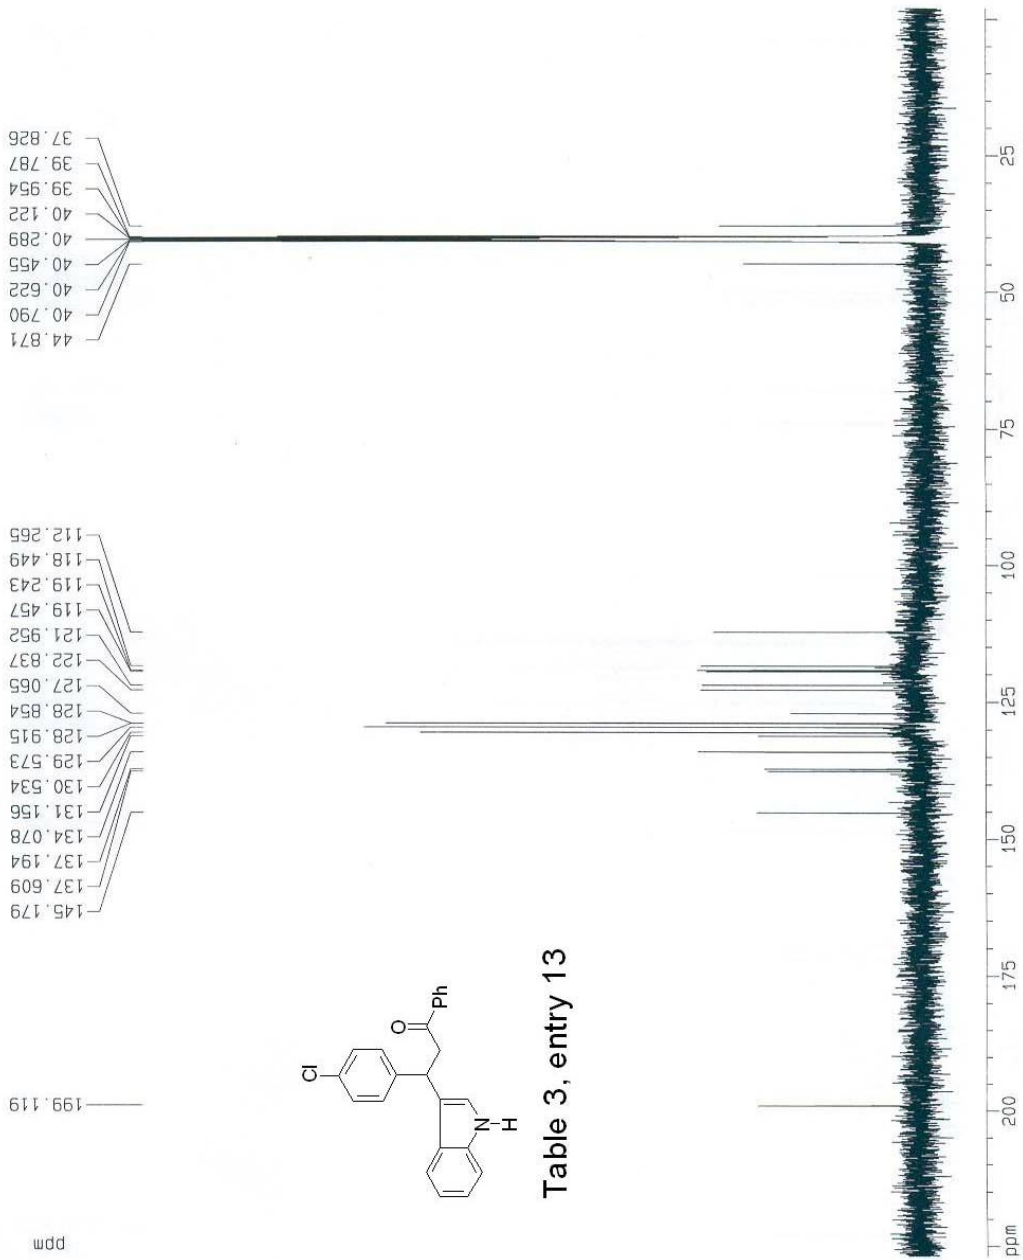

Current Data Parameters  
NAME Aryanesab  
EXPNO 53  
PROCNO 1

F2 - Acquisition Parameters  
Date\_ 20051024  
Time 12.21  
INSTRUM spect  
PROBHD 5 mm BBI 1H-BB  
PULPROG zgpg30  
TD 65536  
SOLVENT DMSO  
NS 568  
DS 2  
SWH 40000.000 Hz  
FIDRES 0.610352 Hz  
AQ 0.8192625 sec  
RG 4597.6  
DM 12.500 usec  
DE 6.50 usec  
TE 292.0 K  
D1 3.00000000 sec  
d11 0.03000000 sec  
DELTA 2.50000010 sec  
ACREST 0.00000000 sec  
MCWRK 0.01500000 sec

\*\*\*\*\* CHANNEL f1 \*\*\*\*\*  
NUC1 13C  
P1 10.50 usec  
PL1 0.00 dB  
SF01 125.7703143 MHz

\*\*\*\*\* CHANNEL f2 \*\*\*\*\*  
CPOPRG2 waltz16  
NUC2 1H  
P2 87.00 usec  
PL2 -6.00 dB  
PL12 12.00 dB  
PL13 12.00 dB  
SF02 500.1320005 MHz

F2 - Processing parameters  
S1 32768  
SF 125.7577350 MHz  
WDW EM  
SSB 0  
LB 1.00 Hz  
GB 0  
PC 1.40

1D NMR plot parameters  
CX 20.00 cm  
CY 74.73 cm  
F1P 226.679 ppm  
F1 28531.82 Hz  
F2P -1.954 ppm  
F2 -250.79 Hz  
PPMCM 11.44367 ppm/cm\*  
HZCM 1439.13037 Hz/cm

Table 3, entry 13

a-134 1H NMR in CDCl3 at 300 K 84/7/23

```

Current Data Parameters
NAME Arynesab
EXPNO 43
PROCNO 1

F2 - Acquisition Parameters
Date_ 20051015
Time 9.05
INSTRUM spect
PROBHD 5 mm BBI 1H-BB
PULPROG zg
TD 32768
SOLVENT CDCl3
NS 4
DS 2
SWH 10000.000 Hz
FIDRES 0.305175 Hz
AQ 1.6385000 sec
RG 128
DN 50.000 usec
DE 6.50 usec
TE 292.5 K
D1 3.00000000 sec
MCREST 0.00000000 sec
MCWRRK 0.01500000 sec

===== CHANNEL f1 =====
NUC1 1H
P1 32.00 usec
PL1 2.00 dB
SFO1 500.1330885 MHz

F2 - Processing parameters
SI 32768
SF 500.1300000 MHz
WDW EM
SSB 0
LB 0.30 Hz
GB 0
PC 1.00

1D NMR plot parameters
CX 18.00 cm
CY 15.13 cm
F1P 9.999 ppm
F1 5000.90 Hz
F2P -0.255 ppm
F2 -127.31 Hz
PPMCM 0.56965 ppm/cm
HZCM 284.90030 Hz/cm
  
```

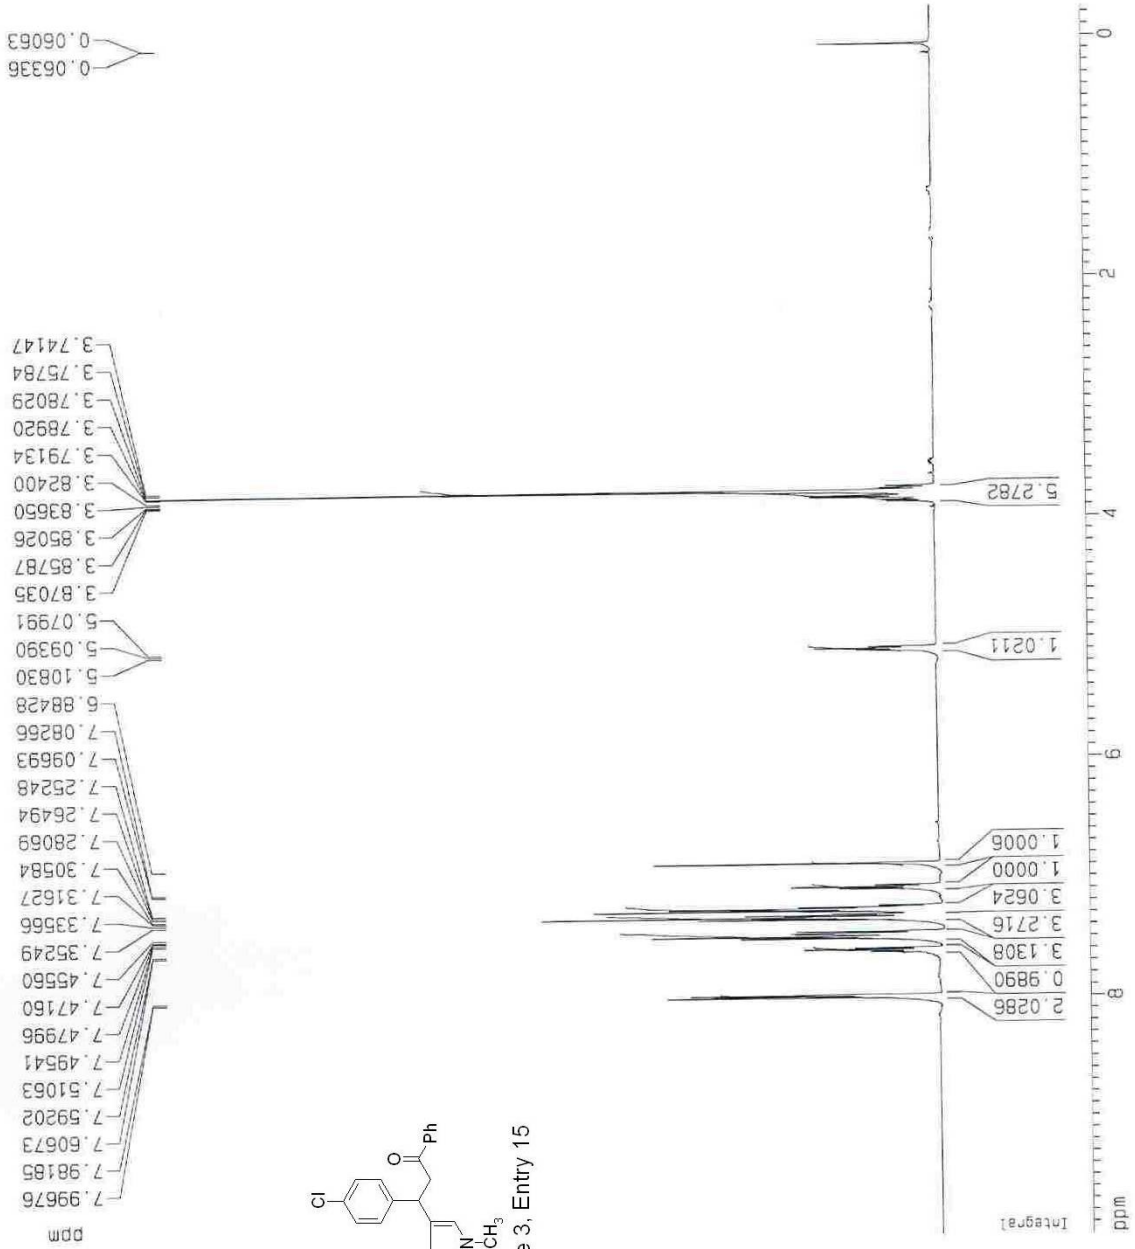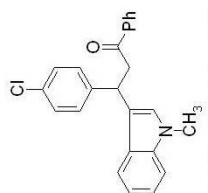

Table 3, Entry 15

α-134 13CNMR in CDCl3 at 300 K B4/7/23

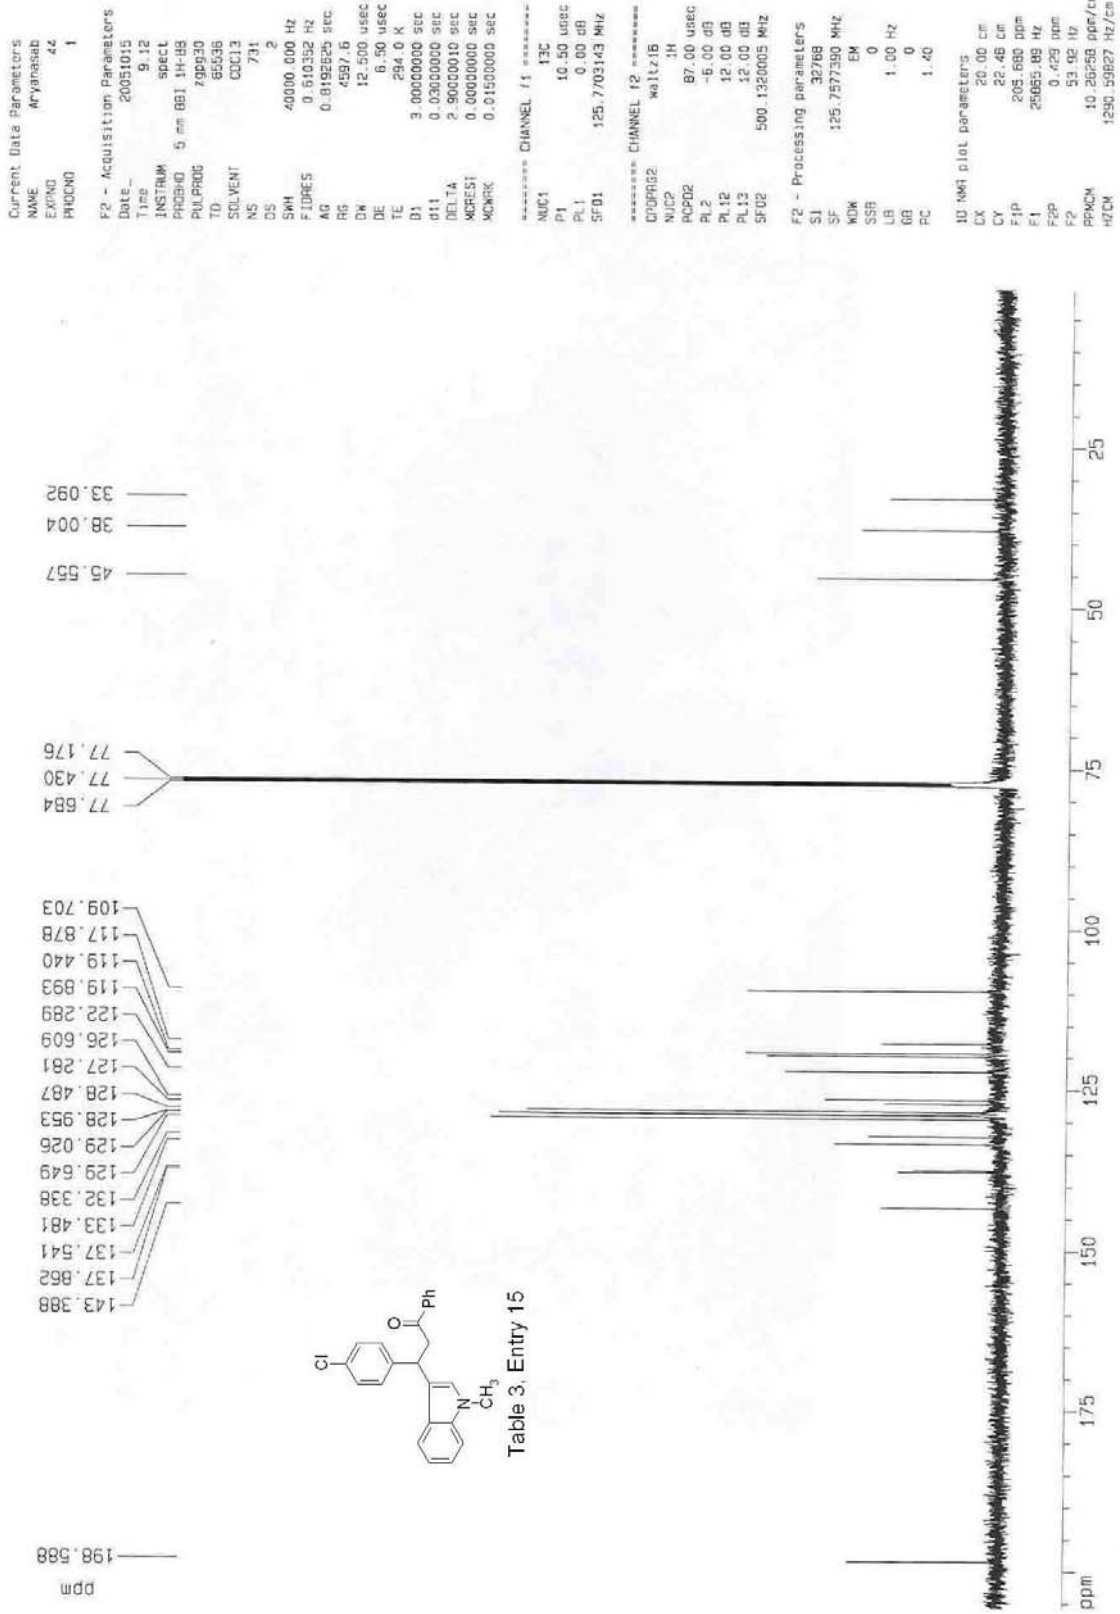



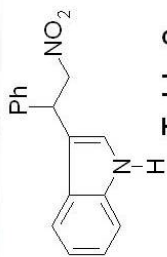

+ CH<sub>3</sub>COOEt

-25 1HNMR in CDCl<sub>3</sub> at 298 K 84/5/22

Table 3, entry 17

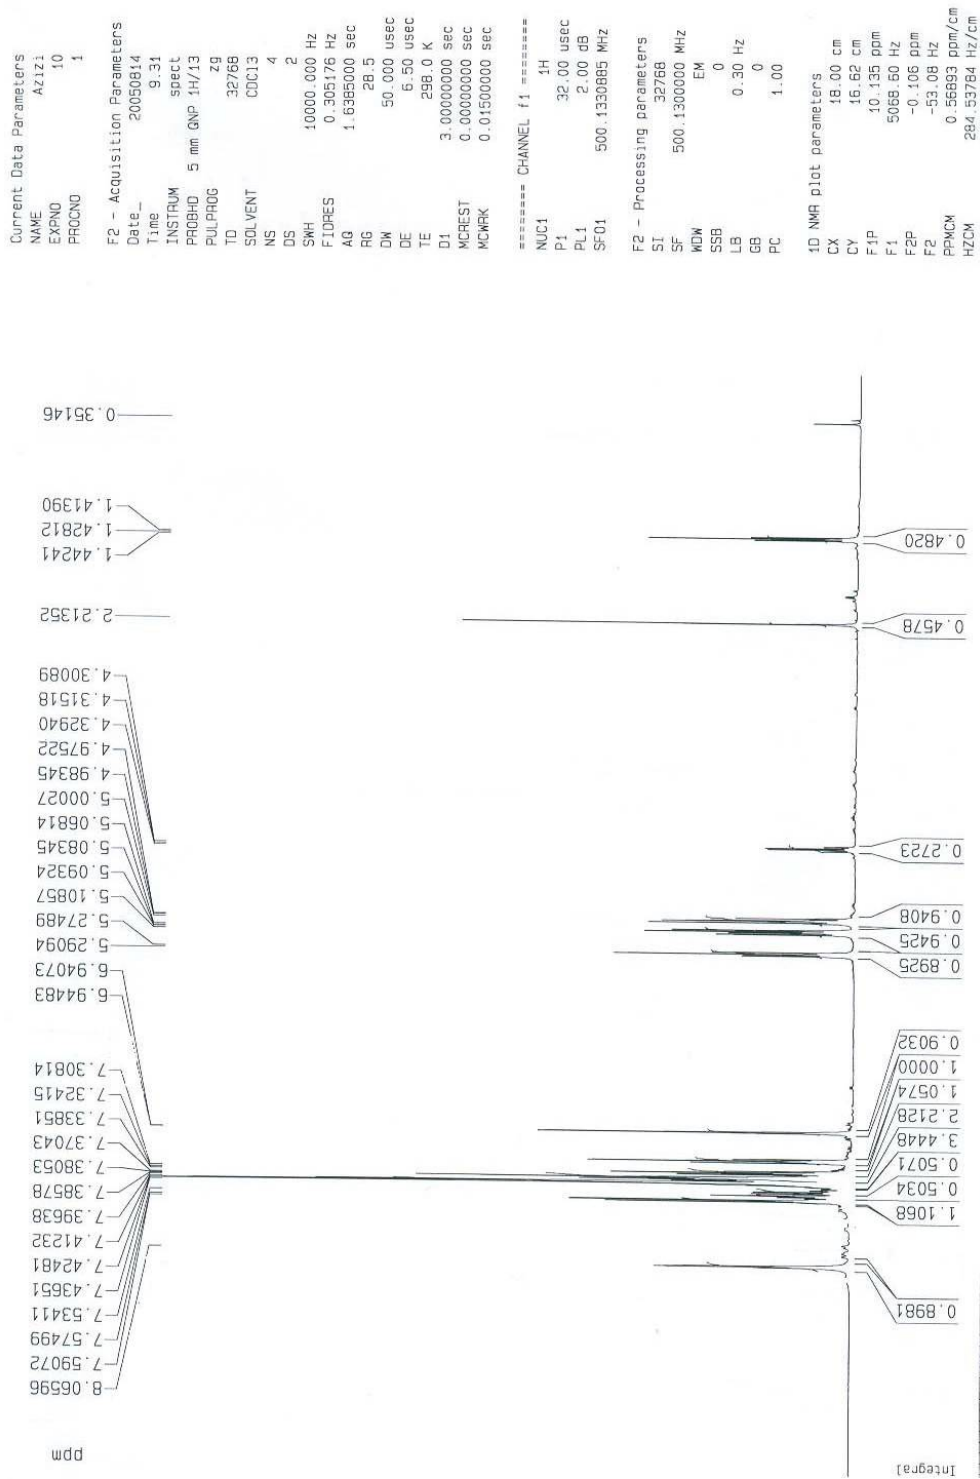

A-25 <sup>13</sup>CNMR in CDCl<sub>3</sub> at 298 K 84/5/22

```

Current Data Parameters
NAME Az121
EXPNO 11
PROCNO 1

F2 - Acquisition Parameters
Date_ 20050814
Time 9:34
INSTRUM spect
PROBHD 5 mm QNP 1H/13
PULPROG zgpg30
TD 65536
SOLVENT CDCl3
NS 65
DS 2
SWH 40000.000 Hz
FIDRES 0.610352 Hz
AQ 0.8192625 sec
RG 2580.3
DW 12.500 usec
DE 5.50 usec
TE 298.0 K
D1 3.0000000 sec
d11 0.0300000 sec
DELTA 2.9000010 sec
MCREST 0.0000000 sec
MCWRK 0.015500000 sec

***** CHANNEL f1 *****
NUC1 13C
P1 9.10 usec
PL1 3.00 dB
SF01 125.7703143 MHz

***** CHANNEL f2 *****
CPDPRG2 waltz16
NUC2 1H
P2 60.00 usec
PL2 0.00 dB
PL12 15.50 dB
PL13 15.50 dB
SF02 500.1320005 MHz

F2 - Processing parameters
SI 32768
SF 125.7577390 MHz
WDW EM
SSB 0
LB 1.00 Hz
GB 0
PC 1.40

1D NMR plot parameters
CX 20.00 cm
CY 7.30 cm
FJP 193.940 ppm
F1 24389.45 Hz
F2 -2.744 ppm
F3 -345.06 Hz
PRMCM 9.83419 ppm/cm
HZCM 1236.72546 Hz/cm
  
```

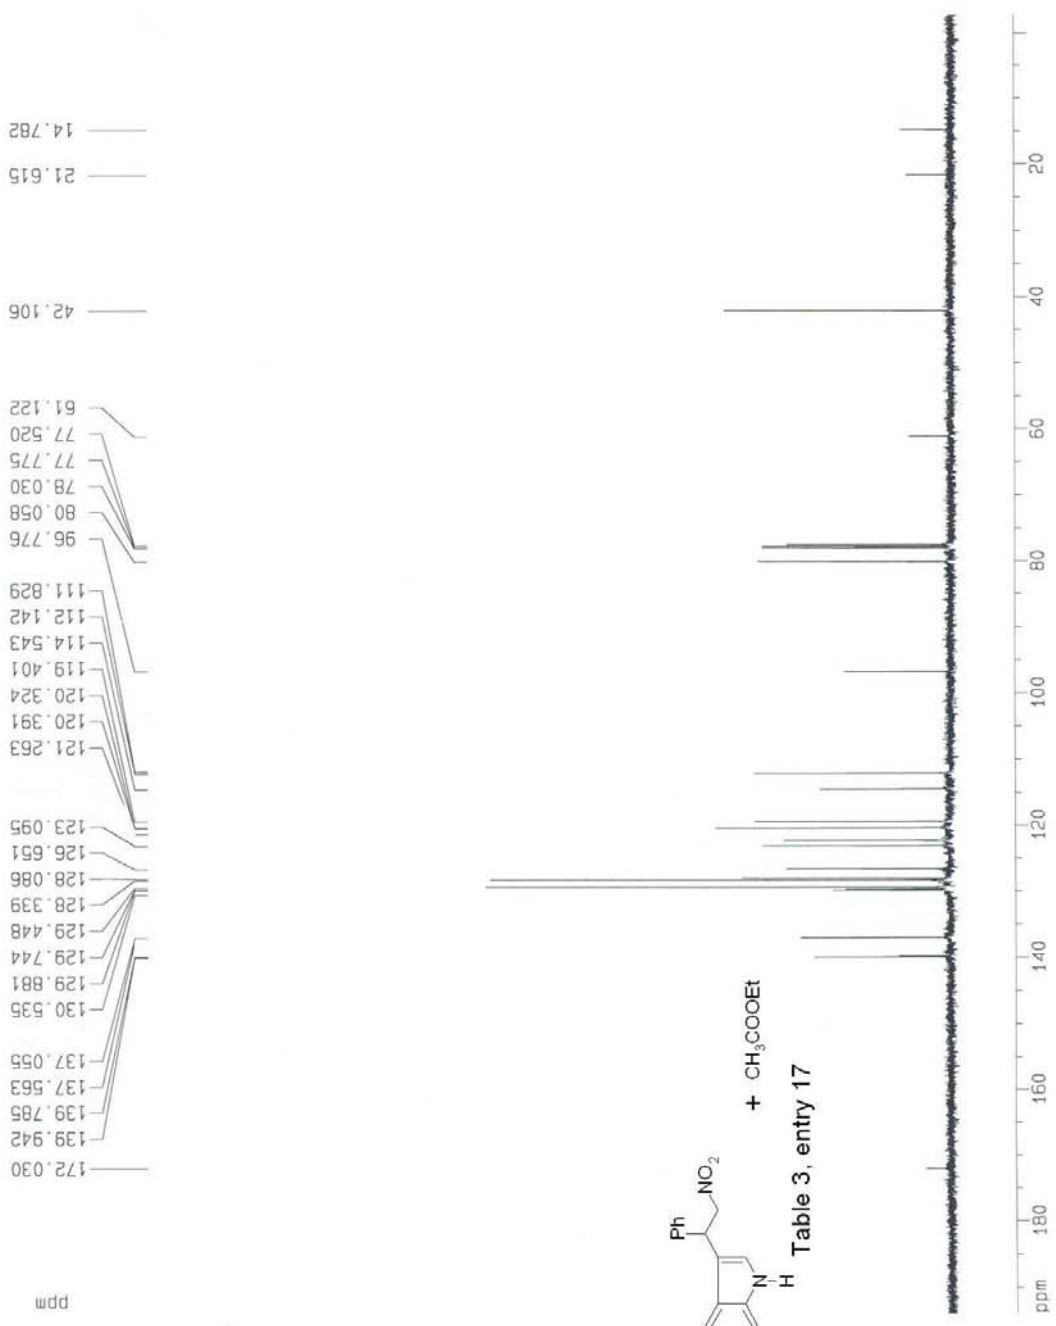

a-79 1H NMR in CDCl3 at 300 K 84/6/22

```

Current Data Parameters
NAME      Aryanassb
EXPNO    22
PROCNO   1

F2 - Acquisition Parameters
Date_    20050913
Time     9.46
INSTRUM  spect
PROBHD   5 mm GNP 1H/13
PULPROG  zg
TD        32768
SOLVENT  CDCl3
NS        1
DS        0
SWH       10000.000 Hz
FIDRES    0.305176 Hz
AQ        1.6385000 sec
RG        181
DM        50.000 usec
DE        6.50 usec
TE        300.0 K
D1        1.00000000 sec
MCREST    0.00000000 sec
MCWRK    0.01500000 sec

***** CHANNEL f1 *****
NUC1      1H
P1        32.00 usec
PL1       2.00 dB
SF01      500.1330685 MHz

F2 - Processing parameters
SI        32768
SF        500.1300000 MHz
KOH       EM
SSB       0
LB        0.30 Hz
GB        0
PC        1.00

1D NMR plot parameters
CX        18.00 cm
CY        18.75 cm
F1P       9.179 ppm
F1        4590.70 Hz
F2P       -0.270 ppm
F2        -135.18 Hz
PPMCM     0.52465 ppm/cm
HZCM      262.54874 Hz/cm
  
```

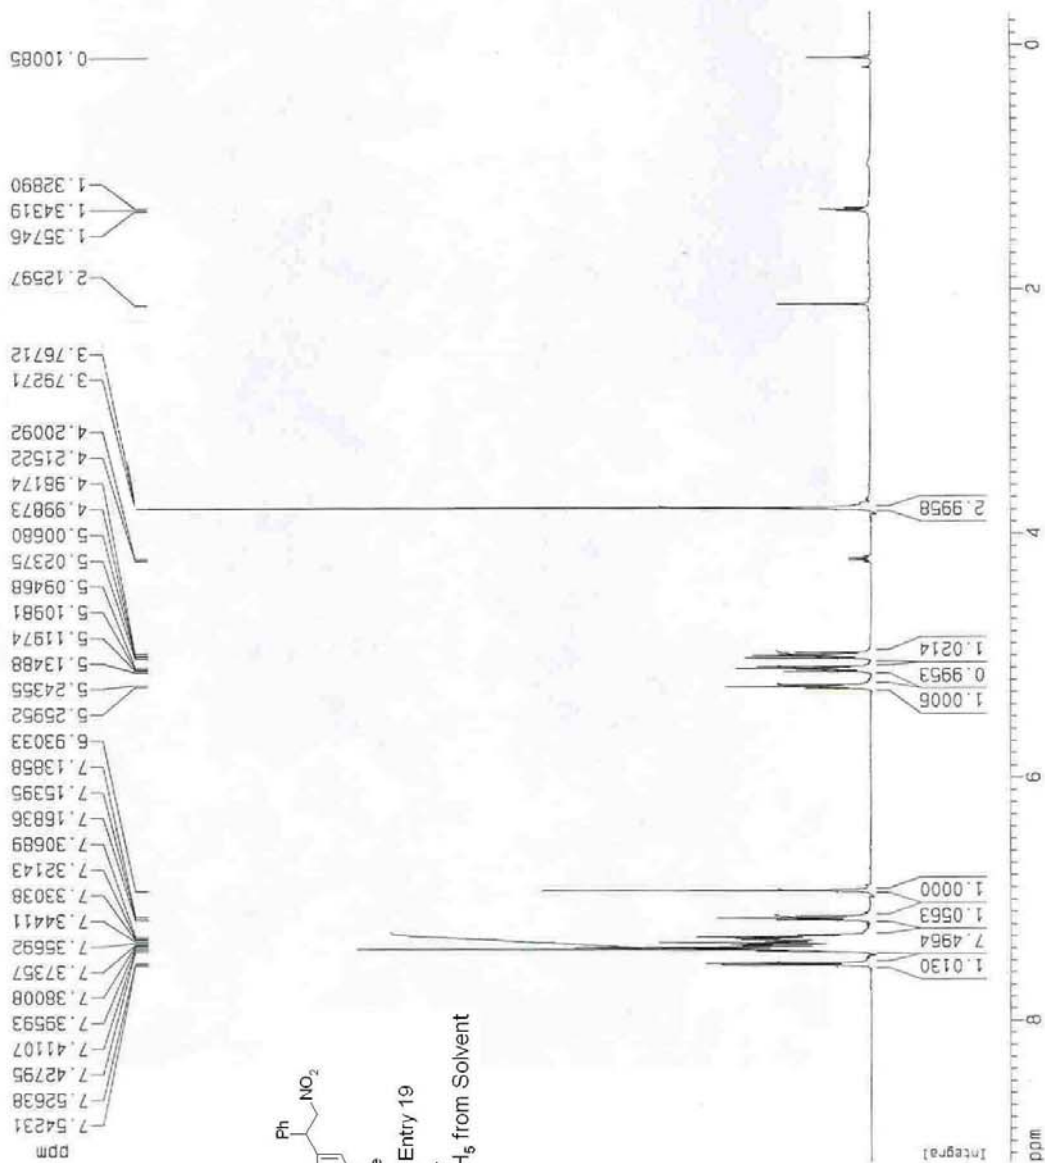

a-79 <sup>13</sup>CNMR in CDCl<sub>3</sub> at 300K 84/6/22

```

Current Data Parameters
NAME      Aryanasab
EXPNO    23
PROCNO    1

F2 - Acquisition Parameters
Date_     20050913
Time      9.48
INSTRUM   spect
PROBHD    5 mm QNP 1H/13
PULPROG   zgpg30
TD         65536
SOLVENT   CDCl3
NS         46
DS         2
SWH        40000.000 Hz
FIDRES     0.610352 Hz
AQ         0.8192625 sec
RG         2580.3
DW         12.500 usec
DE         6.50 usec
TE         300.0 K
D1         3.0000000 sec
d11        0.03000000 sec
DELTA      2.90000010 sec
MCREST    0.00000000 sec
MCWPRK    0.01500000 sec

===== CHANNEL f1 =====
NUC1       13C
P1         9.10 usec
PL1        3.00 dB
SFO1       125.7703143 MHz

===== CHANNEL f2 =====
CPDPRG2    waltz16
NUC2        1H
PCPD2       60.00 usec
PL2         0.00 dB
PL12        15.50 dB
PL13        15.50 dB
SFO2        500.1320005 MHz

F2 - Processing parameters
SI          32768
SF          125.7577350 MHz
WDW         EM
SSB         0
LB          1.00 Hz
GB          0
PC          1.40

1D NMR plot parameters
CX          20.00 cm
CY          21.75 cm
F1P         181.258 ppm
F1          22794.59 Hz
F2P         -6.377 ppm
F2          -801.90 Hz
PPMCM       9.38173 ppm/cm
HZCM        1179.82458 Hz/cm
  
```

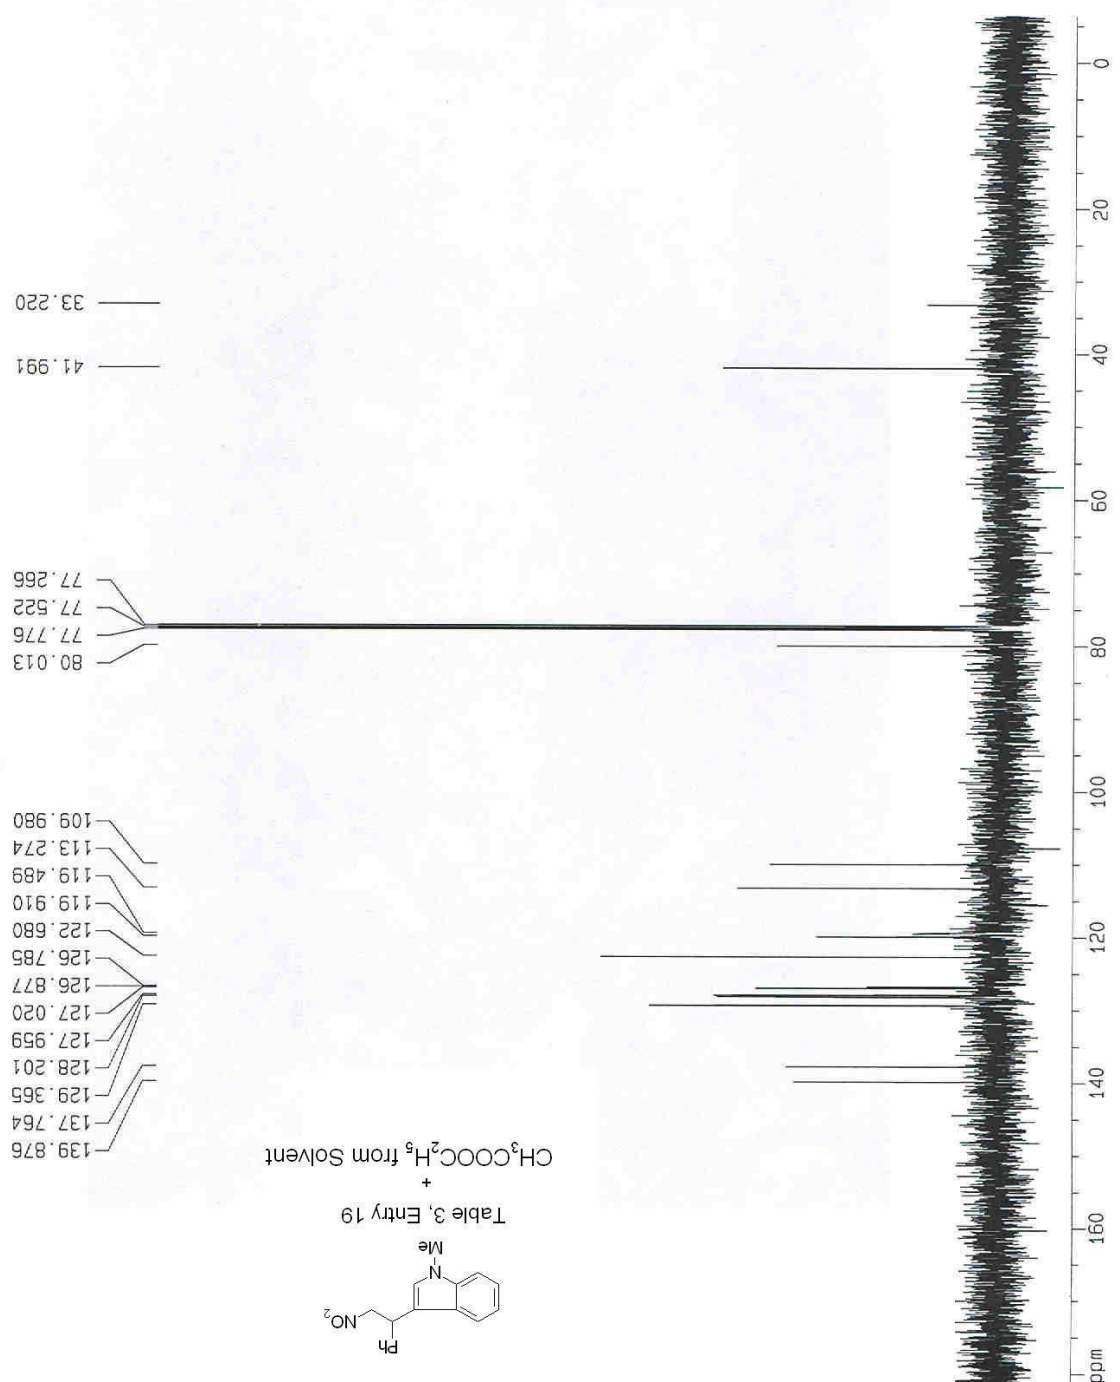

CH<sub>3</sub>COOC<sub>2</sub>H<sub>5</sub> from Solvent

Table 3, Entry 19

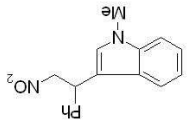

a-190 1H-NMR in CDCl3 at 298 K 84/B/11

Current Data Parameters  
 NAME Aryanasab  
 EXPNO 60  
 PROCNO 1

F2 - Acquisition Parameters  
 Date\_ 20051102  
 Time 10.39  
 INSTRUM spect  
 PROBHD 5 mm BBI 1H-BB  
 PULPROG zg  
 TD 32768  
 SOLVENT CDCl3  
 NS 4  
 DS 2  
 SNH 10000.000 Hz  
 FIDRES 0.305175 Hz  
 AQ 1.6385000 sec  
 RG 32  
 DM 50.000 usec  
 DE 6.50 usec  
 TE 292.5 K  
 D1 3.0000000 sec  
 MCREST 0.0000000 sec  
 MCWRK 0.0150000 sec

\*\*\*\*\* CHANNEL f1 \*\*\*\*\*  
 NUC1 1H  
 P1 10.30 usec  
 PL1 2.00 dB  
 SFO1 500.1330865 MHz

F2 - Processing parameters  
 SI 32768  
 SF 100.1300000 MHz  
 N IM EM  
 SS 0  
 LB 0.30 Hz  
 GB 0  
 PC 1.00

1D NMR plot parameters  
 CX 18.00 cm  
 CY 12.58 cm  
 FIP 10.739 ppm  
 F1 5371.12 Hz  
 F2 -0.171 ppm  
 F2 -85.41 Hz  
 PPMCM 0.60612 ppm/cm  
 HZCM 303.14014 Hz/cm

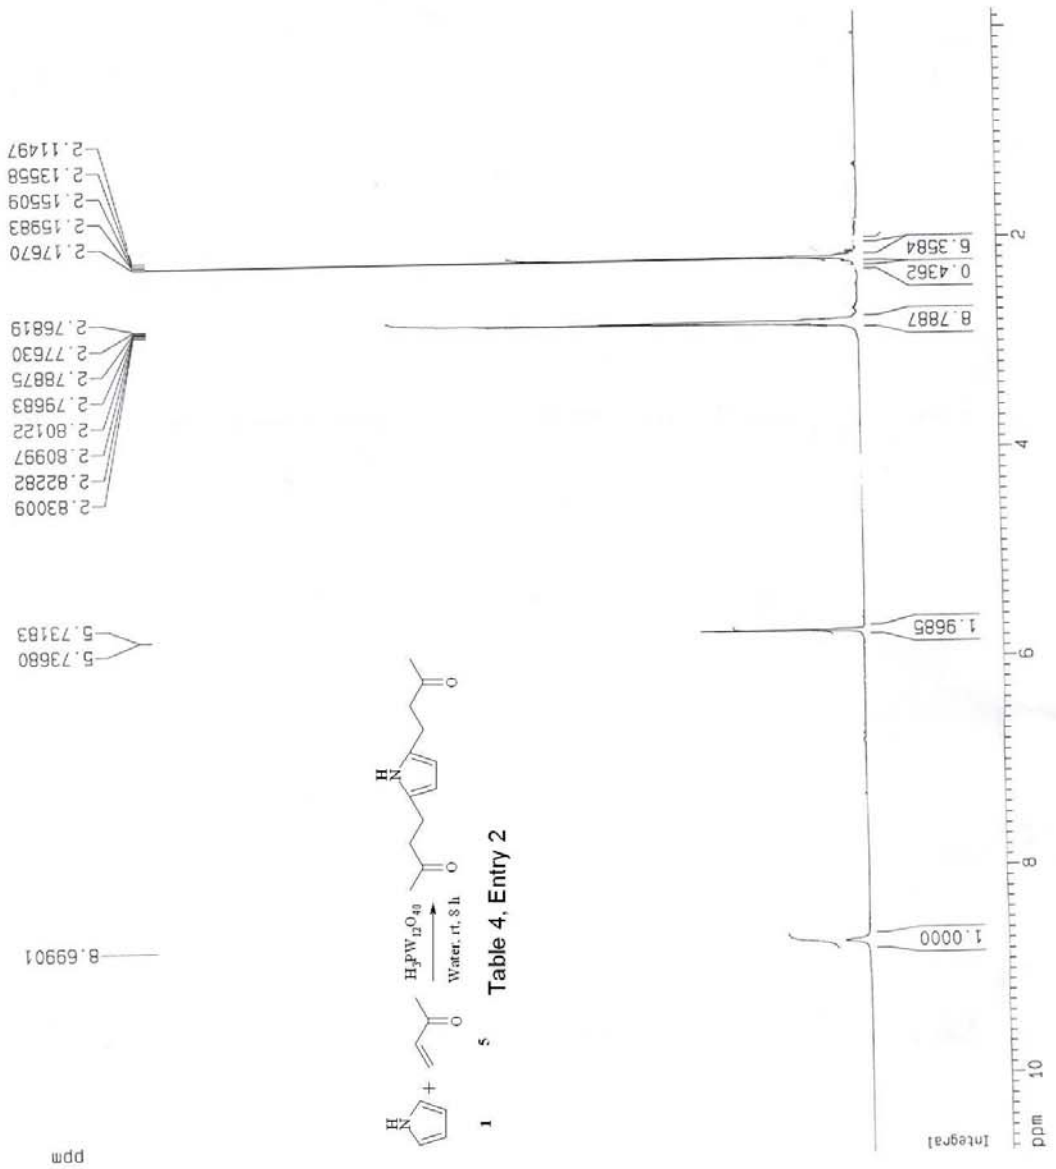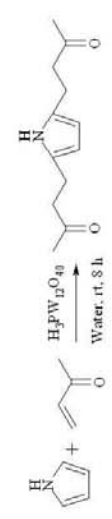

Table 4, Entry 2

a-190 1H NMR in CDCl3 at 298 K 84/8/11

Current Data Parameters  
 NAME Aryanasab  
 EXPNO 61  
 PROCNO 1

F2 - Acquisition Parameters  
 Date\_ 20051102  
 Time 10.40  
 INSTRUM spect  
 PROBHD 5 mm BBI 1H-BB  
 PULPROG zgpg30  
 TO 65536  
 SOLVENT CDCl3  
 NS 33  
 DS 2  
 SWH 40000.000 Hz  
 FIDRES 0.151362 Hz  
 AQ 0.6192525 sec  
 RG 4597.6  
 DW 12.500 usec  
 DE 6.50 usec  
 TE 292.5 K  
 D1 3.0000000 sec  
 d11 0.0300000 sec  
 DELTA 2.90000010 sec  
 MCREST 0.0000000 sec  
 MCWK 0.01500000 sec

===== CHANNEL f1 =====  
 NUC1 13C  
 P1 10.50 usec  
 PL1 0.00 dB  
 SF01 125.7703143 MHz

===== CHANNEL f2 =====  
 CPROGR2 waltz16  
 NUC2 1H  
 P2 87.00 usec  
 PL2 -6.00 dB  
 PL12 12.00 dB  
 PL13 12.00 dB  
 SF02 500.1320005 MHz

F2 - Processing parameters  
 SI 32768  
 SF 125.7577393 MHz  
 MDW FM  
 SSB 0  
 LB 1.00 Hz  
 GB 0  
 PC 1.40

1D NMR p1.c. parameters  
 CX 20.00 cm  
 CY 10.10 cm  
 F1 292.730 ppm  
 F1 26010.07 Hz  
 F2 7.180 ppm  
 F2 -902.57 Hz  
 PPMCK 11.45953 ppm/cm  
 HZCM 1445.65210 Hz/cm

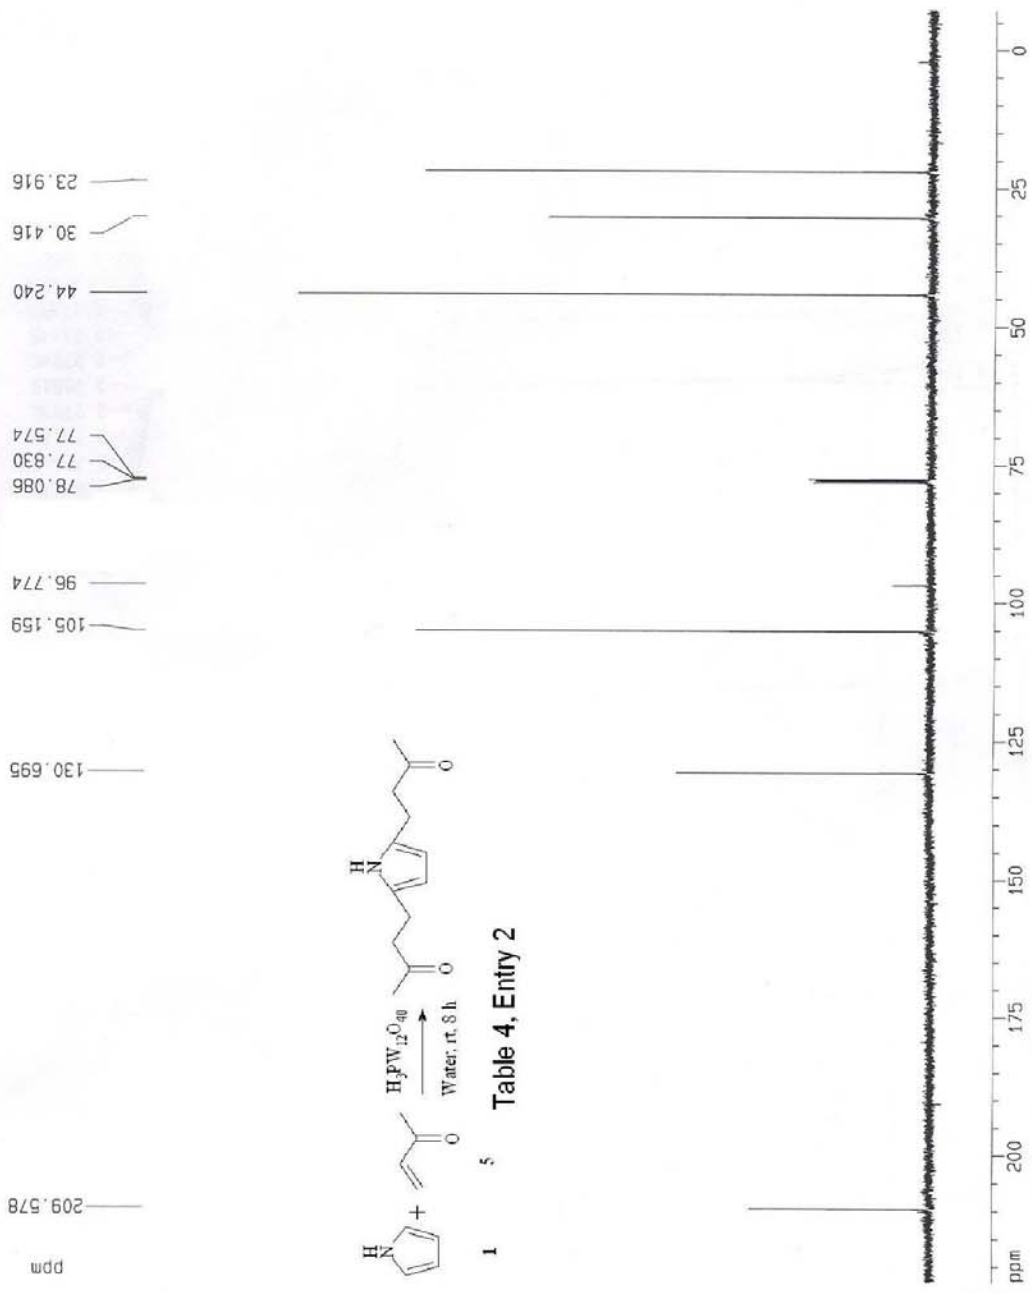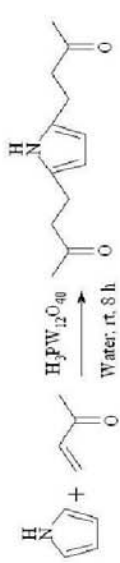

Table 4, Entry 2

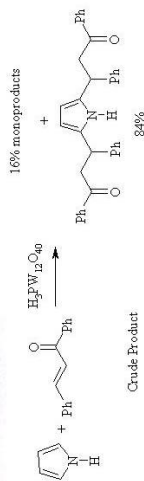

a-92 1HNMR in CDCl3 at 300 K 84/6/26

Current Data Parameters  
 NAME Aryanasab  
 EXPNO 32  
 PROCNO 1

F2 - Acquisition Parameters  
 Date\_ 20050917  
 Time 11.15  
 INSTRUM spect  
 PROBHD 5 mm BBI 1H-BB  
 PULPROG zg  
 TD 32768  
 SOLVENT CDCl3  
 NS 8  
 DS 2  
 SWH 10000.000 Hz  
 FIDRES 0.305176 Hz  
 AQ 1.6385000 sec  
 RG 161.3  
 DW 50.000 usec  
 DE 6.50 usec  
 TE 293.7 K  
 D1 3.00000000 sec  
 MCREST 0.00000000 sec  
 MCWRK 0.01500000 sec

===== CHANNEL f1 =====  
 NUC1 1H  
 P1 32.00 usec  
 PL1 2.00 dB  
 SF01 500.1330885 MHz

F2 - Processing parameters  
 SI 32768  
 SF 500.1300000 MHz  
 WDW EM  
 SSB 0  
 LB 0.30 Hz  
 GB 0  
 PC 1.00

1D NMR plot parameters  
 CX 18.00 cm  
 CY 16.15 cm  
 F1P 10.066 ppm  
 F1 5034.16 Hz  
 F2P -0.343 ppm  
 F2 -172.36 Hz  
 PPMCM 0.57835 ppm/cm  
 HZCM 289.25122 Hz/cm

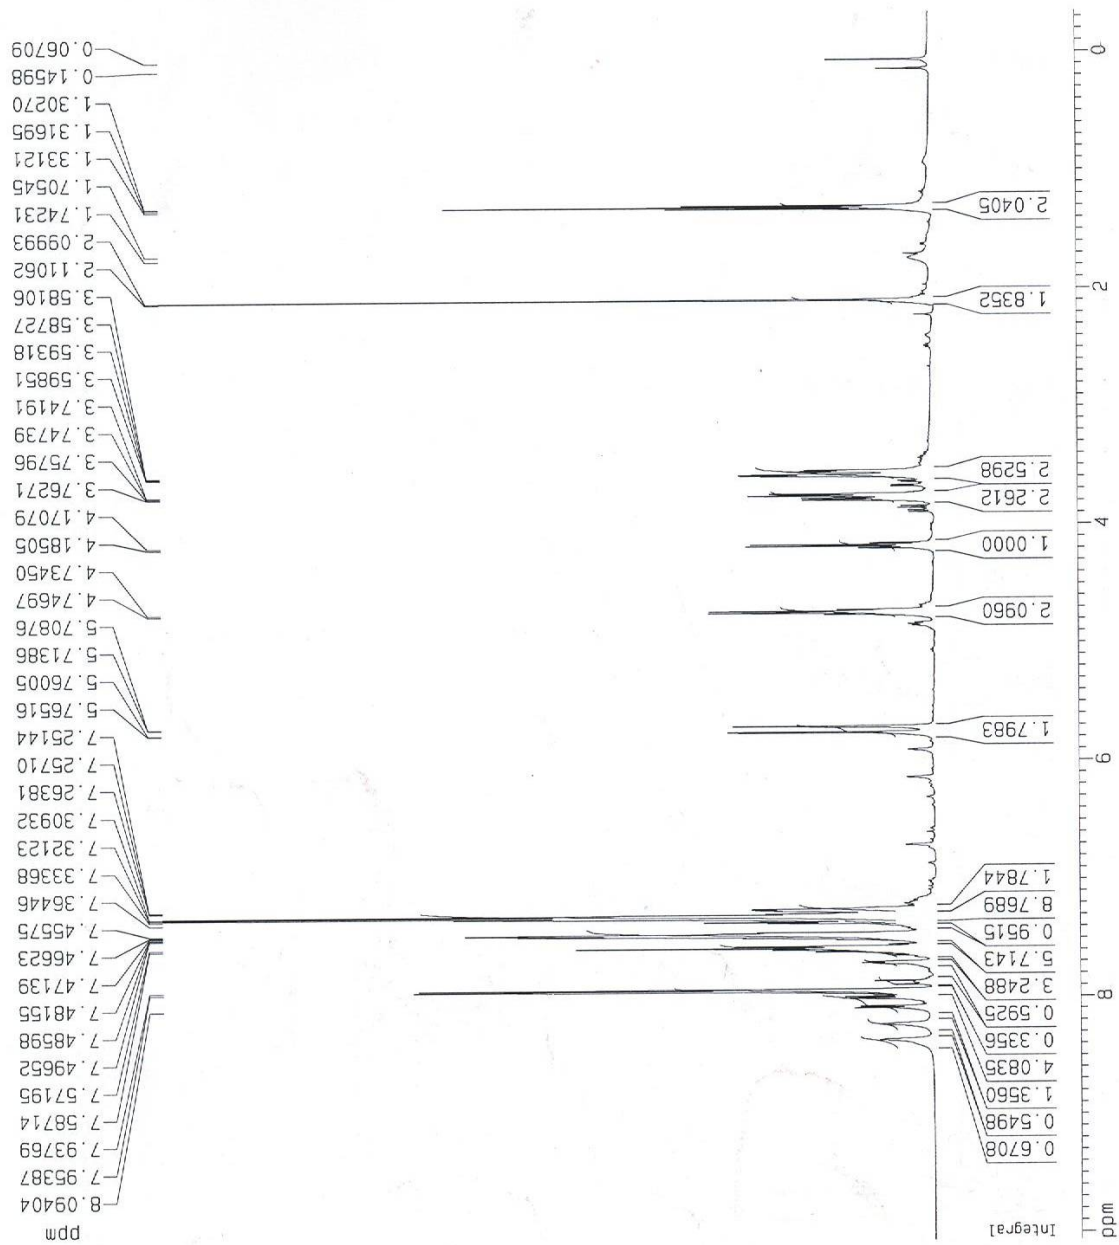

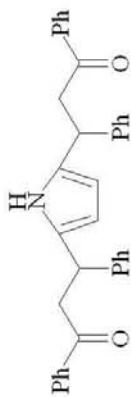

a-91-A <sup>1</sup>H NMR in CDCl<sub>3</sub> at 300 K 84/6/22

Table 4, Entry 3

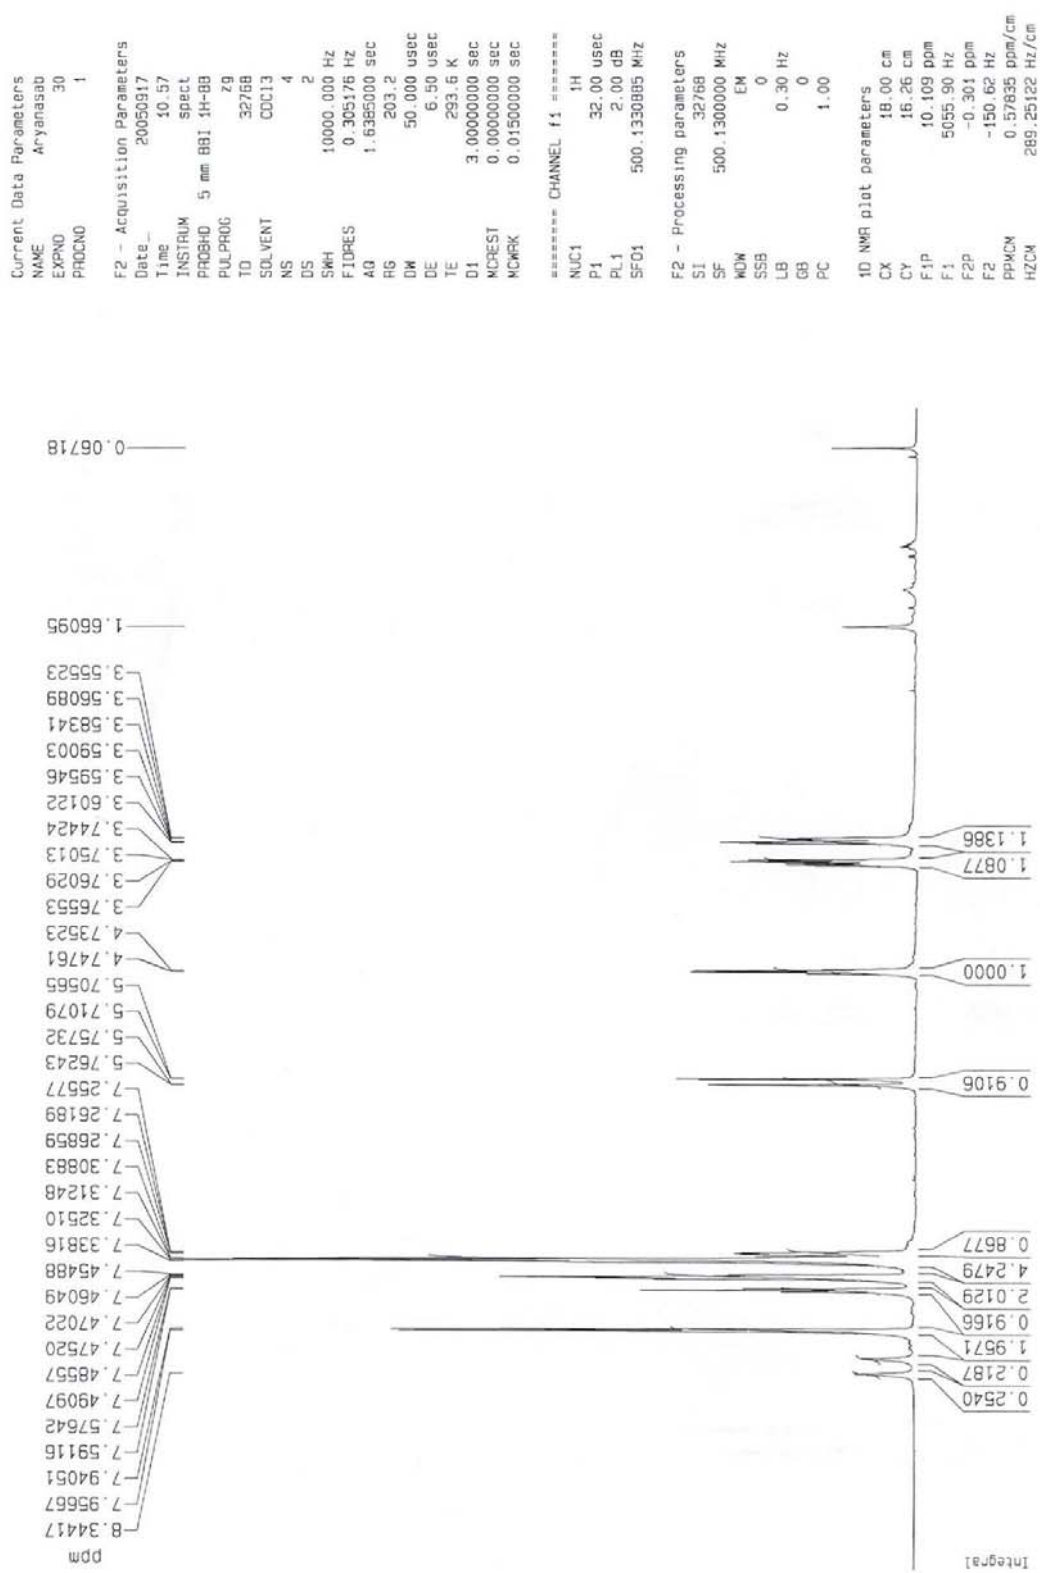



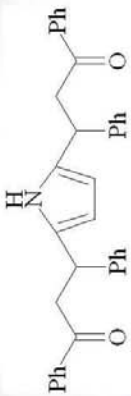

Table 4, Entry 3

α-91A <sup>13</sup>CNMR in CDCl<sub>3</sub> at 300 K 84/5/26

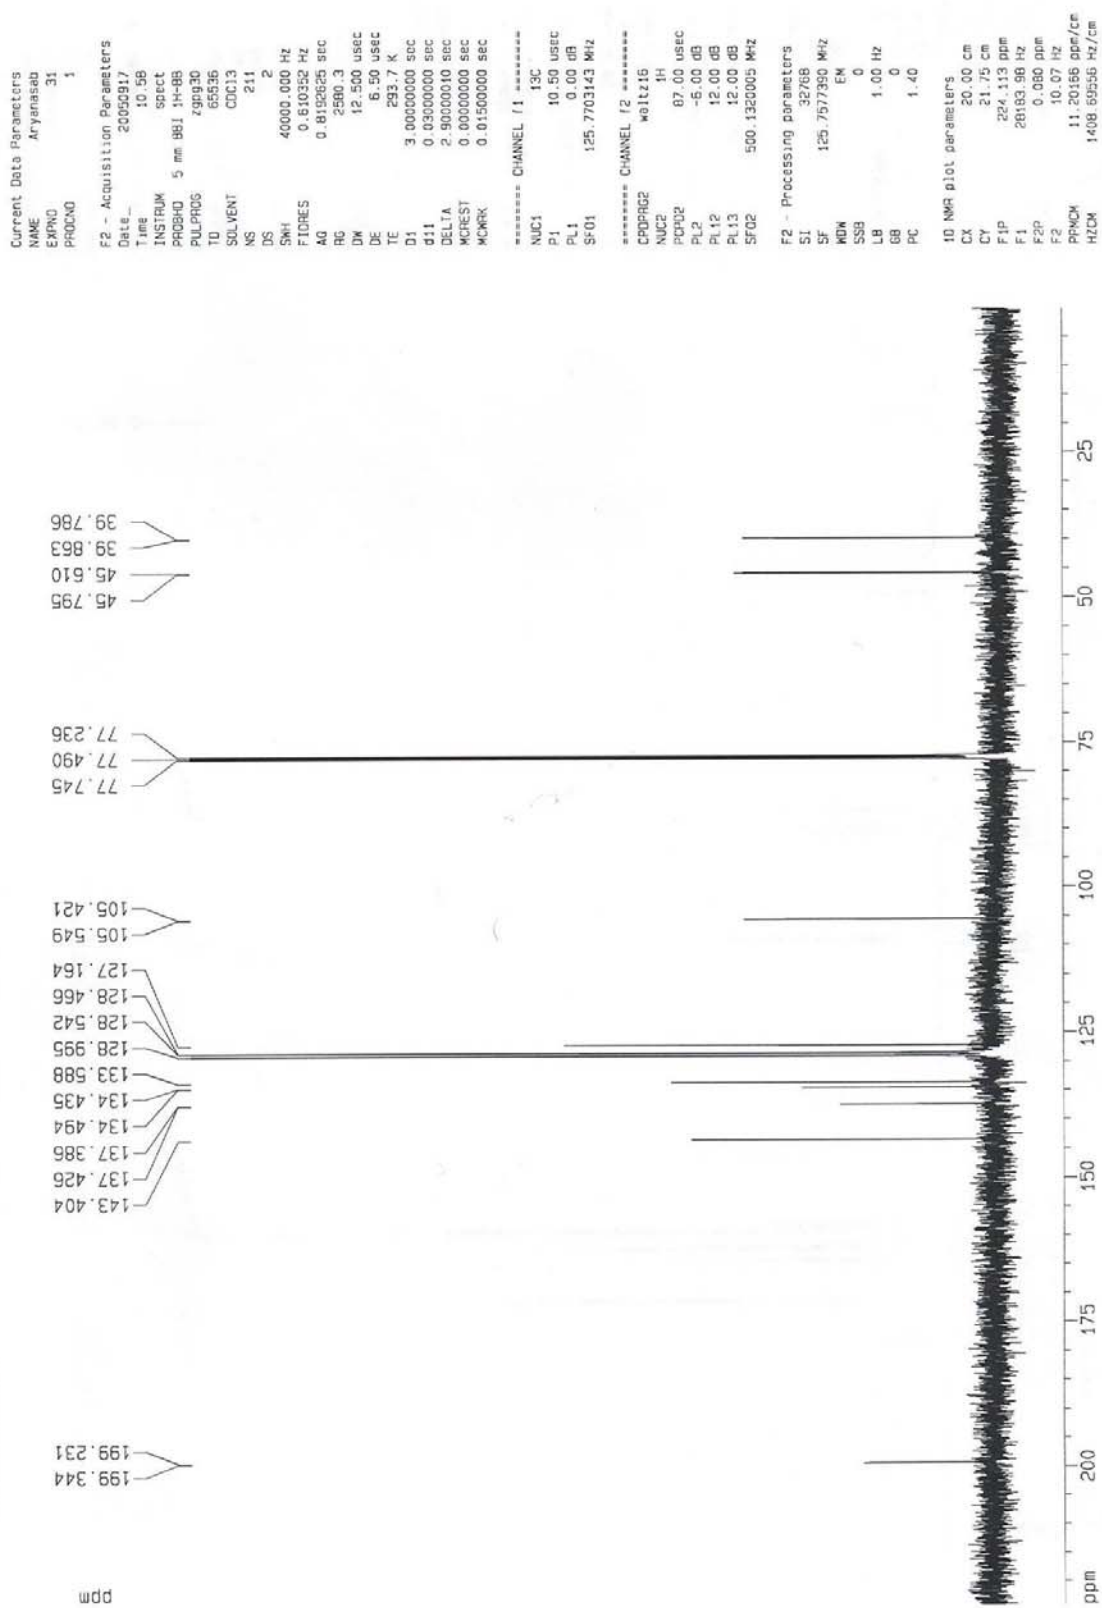

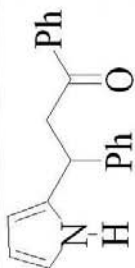

a-91B 1H NMR in CDCl3 at 300 K 84/6/22

Table 4, Entry 3

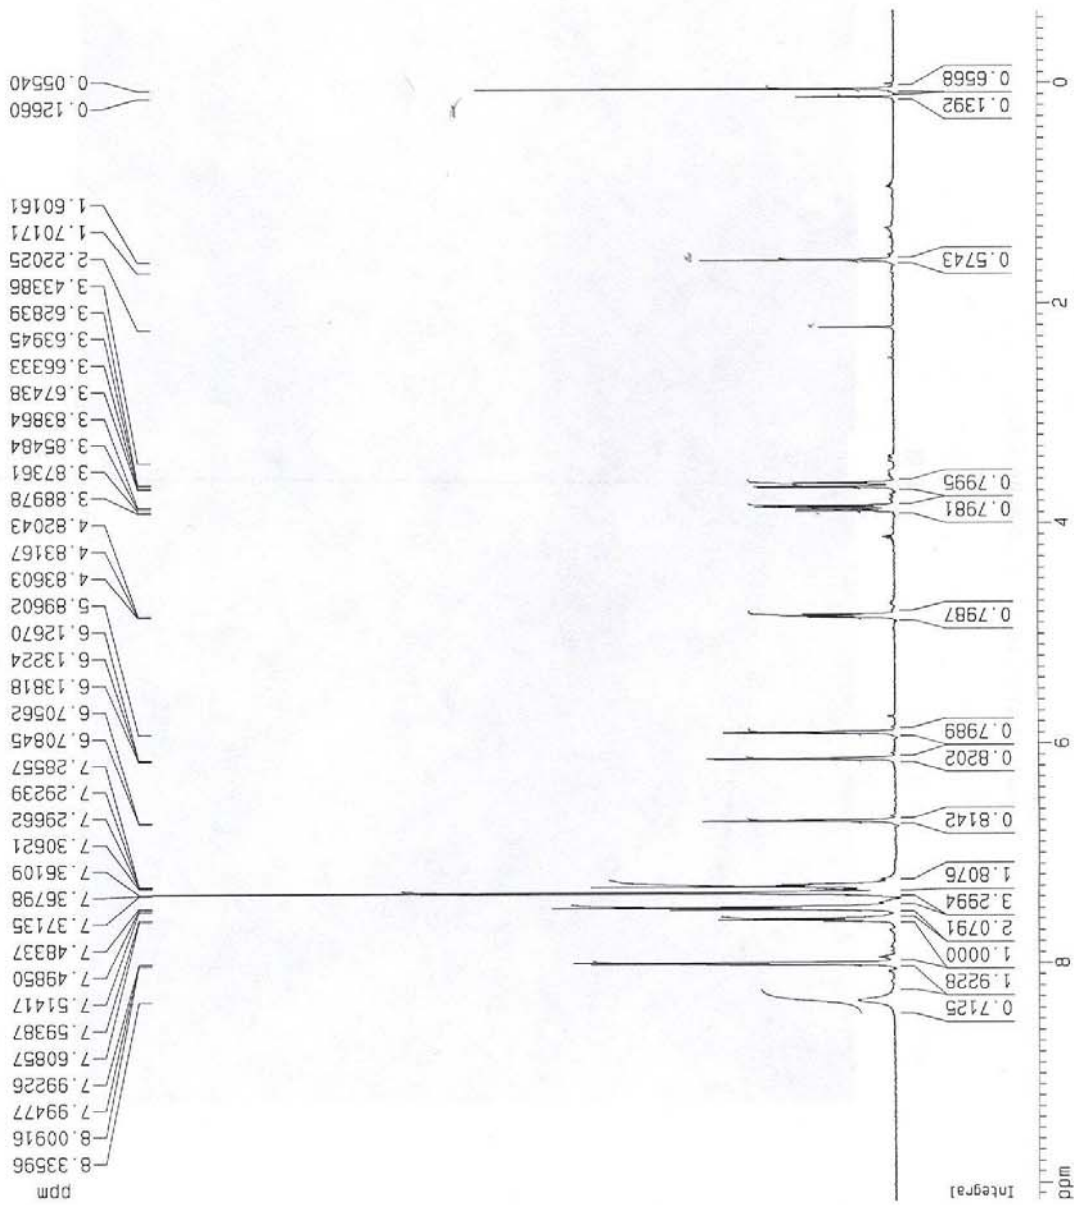

Current Data Parameters  
 NAME Aryanasab  
 EXPNO 24  
 PROCNO 1

F2 - Acquisition Parameters  
 Date\_ 20050913  
 Time 9.53  
 INSTRUM spect  
 PROCNO 5 mm GNP 1H/13  
 PULPROG zg  
 TO 32768  
 SOLVENT CDCl3  
 NS 1  
 DS 0  
 SMH 10000.000 Hz  
 FIDRES 0.305176 Hz  
 AQ 1.6385000 sec  
 RG 574.7  
 DW 50.000 usec  
 DE 6.50 usec  
 TE 300.0 K  
 D1 1.00000000 sec  
 MCREST 0.00000000 sec  
 MCKR 0.01500000 sec

\*\*\*\*\* CHANNEL f1 \*\*\*\*\*  
 NUC1 1H  
 P1 32.00 usec  
 PL1 2.00 dB  
 SF01 500.1330885 MHz

F2 - Processing parameters  
 SI 32768  
 SF 500.1300000 MHz  
 WDW EM  
 SSB 0  
 LB 0.30 Hz  
 GB 0  
 PC 1.00

1D NMR plot parameters  
 CX 18.00 cm  
 CY 17.48 cm  
 F1P 10.166 ppm  
 F1 5084.12 Hz  
 F2P -0.665 ppm  
 F2 -332.55 Hz  
 PRMCM 0.60170 ppm/cm  
 HZCM 300.92583 Hz/cm

## References

1. D. A. Evans, K. A. Scheidt, K. R. Fandrik, L. H. Wai and J. Wu, *J. Am. Chem. Soc.* 2003, **125**, 10780.
2. G. Bartoli, M. Bartolacci, M. Bosco, G. Foglia, A. Giuliani, E. Marcantoni, L. Sambri and E. Torregiani, *J. Org. Chem.* 2003, **68**, 4594.
3. H. Firouzabadi, N. Iranpoor and F. Nowrouzi, *Chem. Commun.* 2005, 789.
4. M. Bandini, P. G. Cozzi, M. Giacomini, P. Melchiorre, S. Selva and A. Umani-Ronchi, *J. Org. Chem.*, 2002, **67**, 3700.
5. B. K. Banik, M. Fernandez and C. Alvarez, *Tetrahedron Lett.* 2005, **46**, 2749.
6. M. Bandini, M. Fagioli, P. Melchiorre, A. Loni and A. Umani-Ronchi, *Tetrahedron Lett.* 2003, **44**, 58.
7. S.-Y. Wang, S.-J. Ji and T.-P. Loh, *Synlett*, 2003, 2377-2379.
8. A. Arcadi, G. Bianchi, M. Chiarini, G. D. Anniballe and F. Marinelli, *Synlett* 2004, 944.
9. B. K. Banik, M. Fernandez and C. Alvarez, *Tetrahedron Lett.* 2005, **46**, 2479-2482.
10. M. Bandini, A. Melloni, S. Tommasi and A. Umani-Ronchi, *Synlett* 2005, 1119-1222.
11. Z.-P. Zhan and K. Lang, *Synlett* 2005, 1551-1554.
